1           **The biofilm matrix scaffold of *Pseudomonas* species consists of non-**  
2                           **canonically base paired extracellular DNA and RNA**

3   Thomas Seviour<sup>1,\*</sup>, Fernaldo Richtia Winnerdy<sup>2</sup>, Lan Li Wong<sup>1</sup>, Xiangyan Shi<sup>2</sup>, Sudarsan  
4   Mugunthan<sup>1</sup>, Gurjeet Singh Kohli<sup>1</sup>, Heather M Shewan<sup>3</sup>, Jason R Stokes<sup>3</sup>, Scott A Rice<sup>1,4,5</sup>, Anh  
5   Tuân Phan<sup>2</sup>, Staffan Kjelleberg<sup>1,5,6</sup>

6   <sup>1</sup> Singapore Centre for Environmental Life Sciences Engineering, Nanyang Technological  
7   University, 637551, Singapore.

8   <sup>2</sup> School of Physical and Mathematical Sciences, Nanyang Technological University, 637371,  
9   Singapore.

10   <sup>3</sup> School of Chemical Engineering, The University of Queensland, 4072, Brisbane, Australia.

11   <sup>4</sup> The iThree Institute, The University of Technology Sydney, Sydney, 2007, Australia.

12   <sup>5</sup> School of Biological Sciences, Nanyang Technological University, 637551, Singapore.

13   <sup>6</sup> Centre for Marine Bio-Innovation, School of Biological, Earth and Environmental Sciences,  
14   University of New South Wales, Sydney, 2052, Australia.

15   \*Correspondence to: [twseviour@ntu.edu.sg](mailto:twseviour@ntu.edu.sg)

16

17 **Abstract**

18 While the array of emergent properties assigned to biofilms is extensive (e.g. antimicrobial  
19 tolerance), the mechanisms that underpin these are largely unknown. In particular, the  
20 extracellular matrix, a defining feature of biofilms, remains poorly understood in terms of its  
21 composition and contribution to biofilm structure and function. Here we demonstrate that  
22 extracellular DNA exists in a complex with RNA that forms the main cross-linking exopolymer  
23 of *Pseudomonas* biofilms, and explains biofilm elasticity. The RNA has a high purine content  
24 and our solid-state NMR data indicate the formation of Hoogsteen guanine base pairs. This may  
25 suggest the presence of G-quadruplexes, which is also corroborated by the enhancement of  
26 biofilm formation in the presence of potassium. The finding that non-canonical interactions  
27 mediate networking of matrix-forming extracellular nucleic acids addresses how eDNA is  
28 organized and contributes to matrix biophysical properties. This understanding will allow for the  
29 development of more effective biofilm control strategies.

30

## 31 **Introduction**

32 Biofilms are key microbial ecosystems that contribute to bacterial pathogenicity (Phillips and  
33 Schultz, 2012), disrupt flow in water filtration systems (Drescher et al., 2013) and facilitate  
34 wastewater treatment bioprocesses (Seviour et al., 2011). They represent bacterial adaptation  
35 strategies allowing for increased antibiotic tolerance (Høiby et al., 2010), enhanced resource  
36 capture (Kurniawan et al., 2012) and the establishment of ecological microniches (de Kreuk et  
37 al., 2007). Such properties are unique to biofilms, in contrast to planktonic bacteria, and are not  
38 mediated directly by the cells but instead by an extracellular polymeric matrix the cells secrete  
39 (Flemming and Wingender, 2010).

40 Exopolymer functions in biofilms have been studied extensively (Seviour et al., 2012),  
41 particularly for *Pseudomonas aeruginosa*, which contributes to one in five clinical infections  
42 (Bodey et al., 1983). No fewer than eight exopolymers have been identified as supporting key  
43 traits in *P. aeruginosa* biofilms, including three exopolysaccharides (Colvin et al., 2012), four  
44 proteins (Allesen-Holm et al., 2006; Borlee et al., 2010; Seviour et al., 2015a) and extracellular  
45 DNA (eDNA) (Okshevsky and Meyer, 2015). Each putative exopolysaccharide (Colvin et al.,  
46 2012) has been identified as a primary structural agent, suggesting the existence of functional  
47 redundancy. Other exopolymers have multiple roles (Irie et al., 2012) and a wide range of  
48 secondary regulatory responses associated with *P. aeruginosa* biofilm exopolymer expression  
49 has been elucidated (Herbst et al., 2015).

50 Despite the ambiguity of the contributions of individual exopolymers, biofilm formation is the  
51 result of these exopolymers changing the matrix's viscous and elastic properties (i.e.  
52 viscoelasticity), where viscosity refers to its fluid properties and elasticity its networked  
53 properties. Polymeric networking is a fundamental requirement for any biofilm (Chew et al.,

54 2014). We undertook to identify the foundation polymer/s in *P. aeruginosa* biofilms, which are  
55 defined here as those that either dominate biofilm elasticity or constitute the primary structural  
56 agent/s.

## 57 **Results**

### 58 **eDNA dominates the elastic response of *Pseudomonas aeruginosa*.**

59 To characterize the foundation polymer of *P. aeruginosa* biofilms we exploited the reported  
60 ability of the ionic liquid 1-ethyl-3-methyl-imidazolium acetate (EMIM-Ac) to dissolve a range  
61 of recalcitrant biopolymers, including DNA (Zhao, 2015) and cellulose (Vitz et al., 2009), which  
62 led us to demonstrate this also for *P. aeruginosa* biofilm exopolymers (Seviour et al., 2015b).  
63 Here, when *P. aeruginosa* biofilms were dissolved in EMIM-Ac, the subsequent fluid was highly  
64 viscoelastic. We measured non-linear elasticity as a shear-rate dependent high normal stress  
65 difference ( $N_1-N_2$ ), where  $N_1$  and  $N_2$  are primary and secondary normal stress differences  
66 respectively. Elasticity dominated the viscous flow properties for the wild type biofilm in  
67 EMIM-Ac, with ( $N_1-N_2$ ) an order of magnitude greater than shear stress (Figure 1A; Wild type).  
68 The solvent (EMIM-Ac) alone exhibited no elasticity, indicating that the elastic properties are  
69 transferred to the EMIM-Ac from the biofilm matrix. Viscosity was slightly shear-thinning  
70 (Supplementary Figure 1A and Supplementary Table 1), which would be expected from dilute  
71 polymer solutions in viscous fluids (i.e. Boger fluids) (Scirocco et al., 2005). ( $N_1-N_2$ ), has a  
72 power law dependence on the shear rate ( $\dot{\gamma}$ ) of 1.4 (Supplementary Figure 1B, Wild type) and  
73 viscoelasticity was accurately modeled by the modified, finitely-extensible nonlinear elastic  
74 (FENE-P) polymer model (Figure 1A-B; Supplementary Tables 1 and 2). The rheological

75 behavior is thus characteristic of solutions containing semi-flexible polymers, such as  
76 DNA(Stokes et al., 2001).

77 The polysaccharides alginate, Pel and Psl have been suggested as the structural scaffolds of *P.*  
78 *aeruginosa* biofilms (Colvin et al., 2012). Their contribution to elasticity was determined using  
79 the mucoid, alginate over-expressing strain PDO300 and isogenic Pel and Psl genetic knockout  
80 mutants (Ghafoor et al., 2011). When Psl is absent, the elasticity (i.e.  $N_1$ - $N_2$ ) and viscosity  
81 increased relative to the wild type and the mucoid strain PDO300, which was less elastic than the  
82 wild type despite the over-expression of alginate (Figure 1;  $\Delta$ Psl). In contrast, when Pel is  
83 absent, there was a slight decrease in both elasticity and viscosity relative to both the wild type  
84 and PDO300 (Figure 1;  $\Delta$ Pel).

85 The contributions of proteins, RNA and DNA were also explored using pronase, RNase A and  
86 DNase I, respectively (Figure 1; Pronase, RNase, DNase). Removing each exopolymer  
87 component individually decreased biofilm elasticity. With the exception of the DNase I-treated  
88 biofilm, all treatments displayed  $n$  values of 0.9 – 1.7 (Supplementary Table 1), consistent with  
89 semi-flexible polymers like DNA(Mansfield et al., 2015). While viscosity was unchanged  
90 following pronase treatment, there was a slight decrease in elasticity. This decrease in elasticity  
91 was even greater following RNase treatment, and elasticity was completely lost upon DNase  
92 treatment, with the normal stress difference reduced to zero. Thus, the elastic response of the  
93 biofilm in EMIM-Ac can be primarily attributed to DNA.

94 The fundamental rheology described here for the *P. aeruginosa* biofilm therefore arises  
95 principally from DNA. This was elucidated for biofilms dissolved in EMIM-Ac as well as for  
96 hydrated, native biofilms displaying the same structural dependence on DNA (Supplementary  
97 Figure 2). This approach of dissolving biofilm in EMIM-Ac to assess the contribution of

98 individual exopolymers to its properties is thus validated. The data suggest that multiple  
 99 exopolymers contribute to the rheology, with the matrix from the  $\Delta$ Psl mutant being the most  
 100 elastic, followed by wild type and RNase A-treated biofilms, which were the least elastic. It has  
 101 been noted previously that a range of *P. aeruginosa* exopolymers influence biofilm extracellular  
 102 matrix crosslinking (Colvin et al., 2012), and the data presented further clarifies that these  
 103 exopolymers can only modulate biofilm rheology if eDNA is present. An eDNA scaffold is  
 104 therefore a prerequisite for this rheological differentiation of the matrix. Further support for the  
 105 presence of an eDNA scaffold is provided in the micrograph of a biofilm stained with TOTO-1  
 106 for DNA visualization (Figure 1C), which shows DNA fibers in the extracellular matrix.

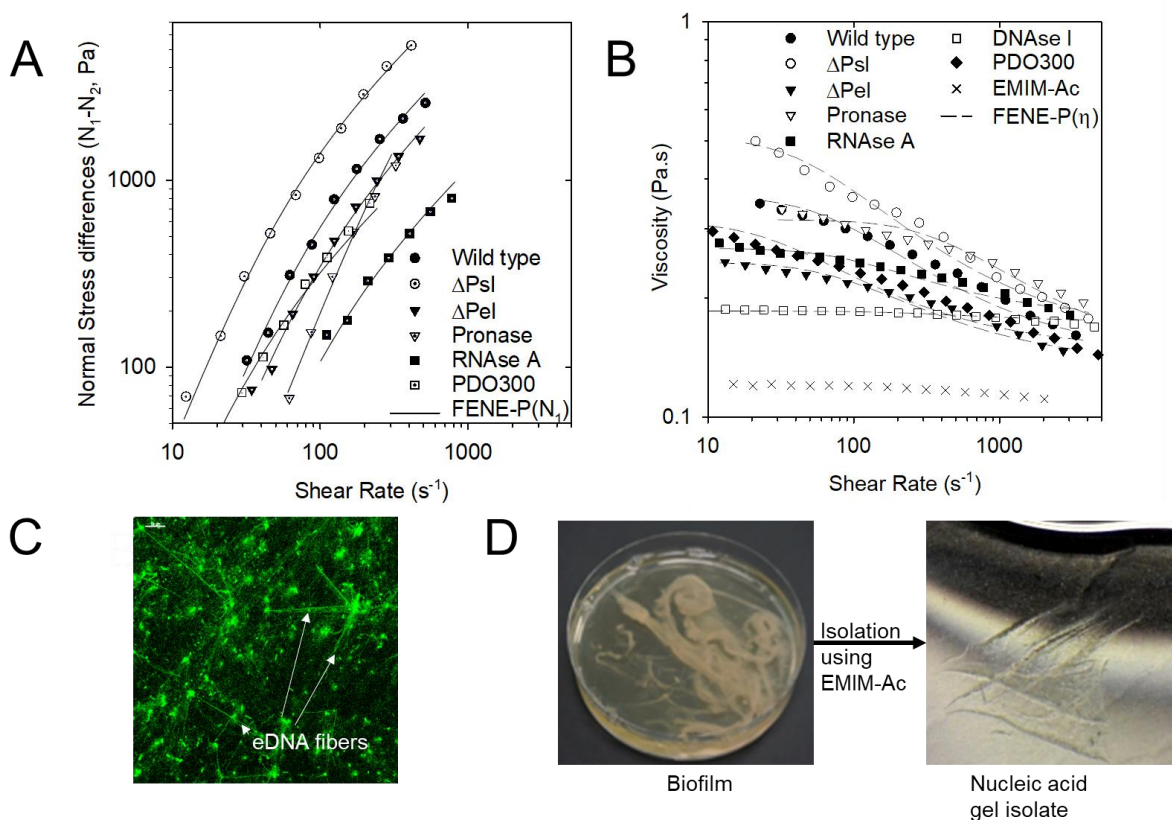

107  
 108 **Figure 1:** (A)  $N_1-N_2$  and (B) viscosity against shear rate for *Pseudomonas aeruginosa* biofilm wild type, PDO300,  
 109  $\Delta$ Psl,  $\Delta$ Pel, and pronase, RNase A and DNase I digested wild type biofilm immediately following dissolution in 1-  
 110 ethyl-3-methylimidazolium acetate (40 mg/mL) at 25 °C, 100  $\mu$ m gap. This is measured as a function of shear stress

111 from 10 to 1000 Pa. ( $N_1 - N_2$ ) is not described for DNase I digested biofilm in Figure 1A and Supplementary Figure  
112 1B as their normal force ( $F_N$ ) is less than the resolution of the rheometer (i.e. 0.1 N) and set to zero for calculating  
113 ( $N_1 - N_2$ ). Both the  $N_1 - N_2$  and viscosity data are fitted with the FENE-P model, a rigid dumbbell model for polymer  
114 solutions. Fitting parameters are shown in Supplementary Table 2. (C) Micrograph of *P. aeruginosa* biofilm DNA  
115 stained green with TOTO-1 (scale bar 10  $\mu\text{m}$ ). (D) Phase separation of extracellular nucleic acids extracted from *P.*  
116 *aeruginosa* biofilms into a gel occurs upon transfer from 1-ethyl-3-methylimidazolium acetate into water.  
117 Furthermore, EMIM-Ac did not lyse either biofilm or planktonic cells as indicated by the intact  
118 cell morphology and the absence of phospholipids and lipopolysaccharides in EMIM-Ac  
119 following biofilm dissolution (Supplementary Figure 3). Therefore, it was concluded that the  
120 DNA dissolved following treatment of *P. aeruginosa* planktonic cells and biofilms with EMIM-  
121 Ac is extracellular and due to extraction of intracellular DNA.

122 This finding that eDNA is a prerequisite for matrix building is consistent with recent studies  
123 reporting the observation of eDNA in biofilm extracellular matrices (Jennings et al., 2015). That  
124 DNA dominated the elastic response would indicate eDNA is not an incidental matrix  
125 component but instead a primary, or foundation structural component of *P. aeruginosa* biofilms.

### 126 **Isolated nucleic acids mimic gel-forming property of *P. aeruginosa* biofilms.**

127 eDNA is known to complex and co-localize with exopolysaccharides. Furthermore, eDNA  
128 sequencing shows that there is no bias towards any specific region of the chromosome (Turnbull  
129 et al., 2016). In contrast to intracellular chromosomal DNA, which is supercoiled and folded, for  
130 example, by HU proteins and topoisomerases, and then relaxed by gyrases to allow replication  
131 and transcription to occur, the organization of eDNA remains elusive. We contend that a  
132 molecular understanding of how the eDNA is assembled and organized is key to answering how  
133 and why DNA transforms from the chromosomal form to that found in the biofilm matrix.

134 We recovered the eDNA from EMIM-Ac following biofilm dissolution by exploiting the ability  
135 of perchloric acid to selectively precipitate DNA over protein (Supplementary Figure 4).  
136 Following further purification by gel permeation chromatography, the polymer phase-separated  
137 into a gel upon transfer from EMIM-Ac into water (i.e. the gel isolate), mimicking the formation  
138 of networks in native biofilms (Figure 1D). A higher  $G'$  was recorded for the gel isolate than for  
139 the *P. aeruginosa* biofilm (Supplementary Figure 5), which is consistent with it having a higher  
140 DNA concentration. Furthermore, DNase degraded the isolated gel into shorter DNA fragments  
141 (Supplementary Figure 6). Other fractions, including those not precipitated by perchloric acid,  
142 did not self-assemble into gels (Supplementary Figure 7A). Similarly, calf thymus DNA did not  
143 form gels when processed the same way, either with or without added cations (Supplementary  
144 Figure 7B), suggesting that this behavior is not a universal property of DNA.

#### 145 **Nucleic acid conformation is preserved during isolation.**

146 Circular dichroism (CD) is an extremely sensitive spectroscopic technique for determining the  
147 secondary structure of biomolecules, particularly proteins and nucleic acids. It was used here to  
148 understand whether the nucleic acid (NA) conformation was modified during extraction and  
149 isolation. Unprocessed *P. aeruginosa* biofilms displayed a major circular dichroism (CD) peak at  
150 250-285 nm (Figure 2A), which is consistent with the presence of NA (Kypr et al., 2009) and  
151 this peak was also observed to dominate the CD spectrum of the gel isolate (Figure 2B). The  
152 spectral trough at 225.5-226.5 nm is typical for proteins (Greenfield, 2006). NA can also display  
153 a trough in this region, although the relative depth of the trough and its absence after proteolysis  
154 and fractional precipitation against proteins (Supplementary Figure 4) suggest that it denotes  
155 proteinaceous material. Hence, even though the CD spectrum shows that proteins are significant



156 components of the biofilm matrix, they are not major contributors to biofilm elasticity (Figure  
157 1A).

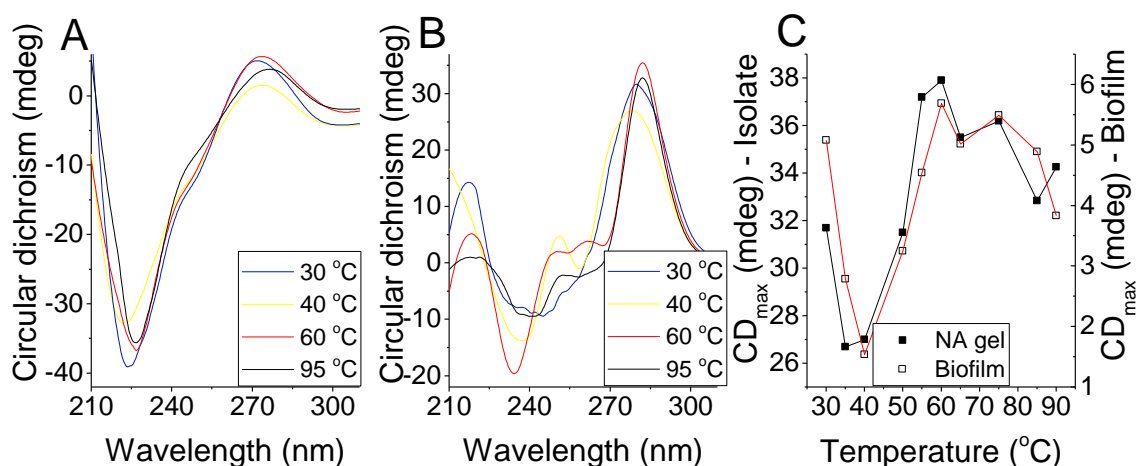

158  
159 **Figure 2:** Circular dichroism (CD) spectra of (A) *Pseudomonas aeruginosa* biofilm and (B) extracellular nucleic  
160 acids (NA) gel isolate at temperatures between 30 and 95°C. (C) Amplitude of dominant NA peak,  $CD_{max}$  (260-285  
161 nm), from CD spectra of *P. aeruginosa* biofilm (seen in (A)) and its extracted extracellular nucleic acid gel (seen in  
162 (B)) from T = 30°C to T = 95°C.

163 The CD spectrum of the isolated NA gel (Figure 2B) is dominated by the same NA peak that  
164 appears in the biofilm CD spectrum. To confirm this similarity, CD melting experiments were  
165 performed on both samples. The resulting melting curves (Figure 2C) show that their maximum  
166 absorbance values follow the same trend across the temperature profiles, with a minimum  
167 absorbance at 40°C, a maximum at 60°C and only partial absorbance attenuation at 95°C. NA  
168 conformation was thus preserved during its isolation and the NA are more stable than typical,  
169 canonical DNA duplexes (Khandelwal and Bhyravabhotla, 2010). The extracted NA gel isolate  
170 is therefore an accurate proxy for understanding the intermolecular interactions that stabilize the  
171 extracellular matrices of *P. aeruginosa* biofilms. Moreover, the CD spectrum of the NA gel  
172 isolate informs on the nucleic acid conformation. In addition to the peak at 272 nm, there is a  
173 trough that shifts from 245 to 230 nm with increasing temperature, another maximum at 215 nm

174 that remains constant with temperature, and other sub-maxima at 260 and 253 nm that change  
175 with temperature. The absence of a trough at 200-215 nm precludes the possibility of NA in A-  
176 or Z- conformations (Kypr et al., 2009). The dominant maximum and minimum could indicate  
177 either B-DNA or G-quadruplex conformations (del Villar-Guerra et al., 2018), although the peak  
178 at 215 nm is not a feature of B-DNA CD spectra and is slightly higher than the characteristic G-  
179 quadruplex low wavelength peak of 210 nm. Nonetheless, the appearance of several peaks in the  
180 NA region of 250-285 nm indicates that, while the dominant NA conformation is unclear, several  
181 conformations likely contribute to phase separation of the NA.

### 182 **Purine-rich ribonucleotides and eDNA are present in isolated gel.**

183 Total correlation spectroscopy (TOCSY) and  $^1\text{H}$ - $^{13}\text{C}$  heteronuclear single quantum coherence  
184 (HSQC) are nuclear magnetic resonance (NMR) techniques that can identify proton NMR  
185 correlations within individual ribose sugars and their proton-carbon single bond correlations  
186 respectively. Raising the pH can solubilize *P. aeruginosa* biofilms (Friedman and Kolter, 2004)  
187 and here we show that after alkalization, the NA peaks dominated the solution  $^1\text{H}$ - $^{13}\text{C}$  HSQC  
188 spectra for the isolated material with no indication that proteins or polysaccharides were present  
189 (Supplementary Figure 8; (Wüthrich, 2008)). The  $^1\text{H}$ - $^{13}\text{C}$  HSQC-TOCSY spectrum of the  
190 isolated gel when dissolved by alkalization shows two clusters of sugar proton peaks (C1'-H1')  
191 with correlations to neighboring carbons (C2'-H1') (Figure 3A).

192 The first cluster (rectangles) has C2' chemical shift values of ~40 ppm and the second cluster  
193 (ovals) has C2' values of ~70 ppm. The  $^1\text{H}$ - $^{13}\text{C}$  correlations denoted by the rectangles therefore  
194 arise from deoxyribose and those denoted by the ovals from ribose sugar conformations. The  
195 broadened form of the deoxyribonucleotide peaks is consistent with high molecular weight  
196 (MW) molecules, while the sharpness of the ribonucleotide peaks suggests that they could arise

197 from small, possibly even single nucleotides. Hence, eDNA and small ribonucleotides are both  
198 likely to be present in the gel dissolved by alkalization.

199 Spin-systems for the eight sharp ribonucleotide peaks (Figure 3B) were assigned by HSQC-  
200 TOCSY and correlation spectroscopy (COSY) (Supplementary Figure 9) with absolute  
201 identification achieved by comparing the heteronuclear multiple bond correlation HMBC spectra  
202 of samples and monoribonucleotide standards (Supplementary Figure 10). The  $^{31}\text{P}$  NMR  
203 spectrum of the NA gel isolate at elevated pH revealed the presence of a mixture of  
204 monoesterified (3.4 to 4.1 ppm) and diesterified phosphates (-0.8 to -1.2 ppm), indicating the  
205 coexistence of monoribonucleotides and DNA respectively (Figure 3C (i)). Long-range  $^{31}\text{P}$ - $^1\text{H}$   
206 correlations (i.e. from NA phosphorous to adjoined ribose proton) were observed in the  $^{31}\text{P}$ - $^1\text{H}$   
207 heteronuclear correlation (HETCOR) spectrum (Figure 3C (ii)) for both monoribonucleotides  
208 and DNA. The broad  $^{31}\text{P}$ - $^1\text{H}$  cross peaks at  $\sim$ -1.0 ppm (Figure 3C (ii)) correspond to long-range  
209 correlations between DNA phosphorous to H3' and H5'/H5'' protons. The eight  
210 monoribonucleotides were assigned to 2'- and 3'-(A, U, G, and C)-monophosphates. We  
211 therefore have both 2' and 3' monoribonucleotides present with the eDNA in the gel solubilized  
212 under alkaline conditions.

213 However, the monoribonucleotide peaks only became resolved upon alkaline dissolution of the  
214 biofilm, in contrast to the broad peaks evident at pH 7 (Supplementary Figure 11). This indicates  
215 that the monoribonucleotides are derived from chain structures that exist at biological pH and  
216 assemble with DNA chains into higher-order networked structures, which is consistent with the  
217 observation in Figure 1A that RNA is a major contributor to *P. aeruginosa* biofilm elasticity.

218

219

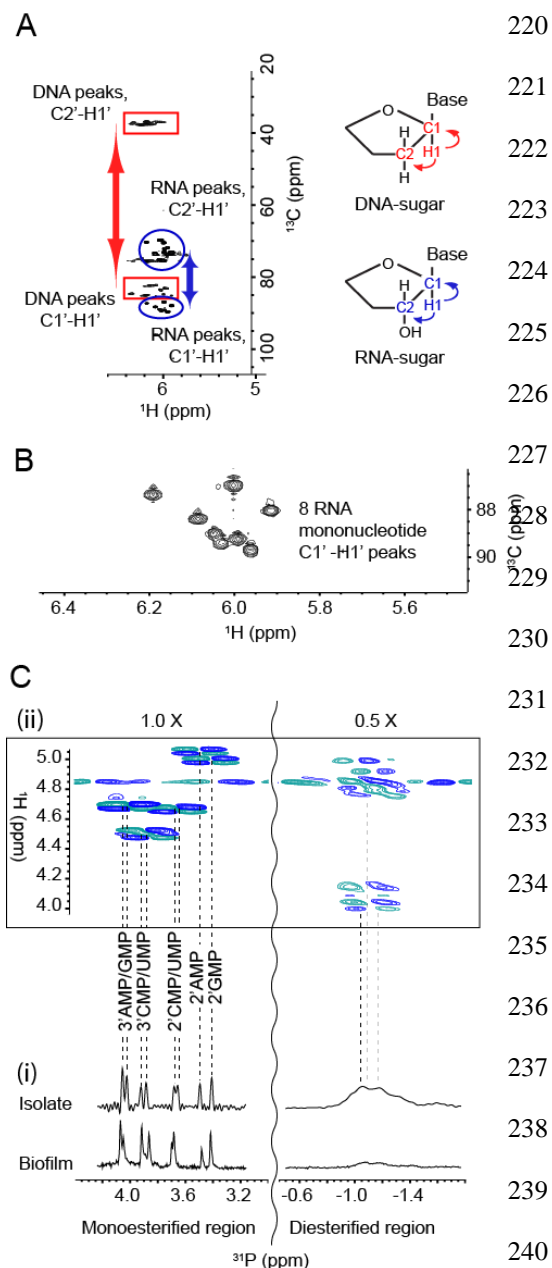

**Figure 3:** (A) Nuclear magnetic resonance (NMR)  $^1\text{H}$ - $^{13}\text{C}$  heteronuclear single quantum coherence (HSQC)-total correlation spectroscopy (TOCSY) spectrum at 25°C of extracellular nucleic acids (NA) gel isolate after alkalization showing the C1'-H1' cross peaks of RNA (blue ovals) and DNA (red rectangles) and their correlations to the neighboring carbon C2'-H1'. Schematics (right) illustrate these correlations. (B)  $^1\text{H}$ - $^{13}\text{C}$  HSQC spectrum of extracellular NA gel isolate at 25°C after alkalization identifying eight monoribonucleic acid ribose spin systems. (C) 1-D  $^{31}\text{P}$  NMR of NA isolate gel and *Pseudomonas aeruginosa* biofilm with proton decoupling showing the presence of monoesterified (i.e. monoribonucleotides) and

diesterified (i.e. DNA) phosphate peaks (i), and 2-D  $^1\text{H}$ - $^{31}\text{P}$  heteronuclear correlation (HETCOR) spectrum of extracellular NA showing the  $^{31}\text{P}$ - $^1\text{H}$  cross-peaks of monoribonucleotides and DNA (ii). Couplings of monoesterified phosphates to H2' or H3' of eight monoesterified monoribonucleotides (from left to right: 3' AMP/3' GMP, 3' CMP/3' UMP, 2' CMP/2' UMP, 2' AMP, 2' GMP); and diesterified phosphate to DNA H3' and H5'/H5'' protons, are denoted by the dashed lines. There is a discontinuity (wavy line) in the  $^{31}\text{P}$  axis due to the different thresholds required to illustrate the  $^{31}\text{P}$ - $^1\text{H}$  correlations in the mono-esterified and di-esterified regions. All samples were prepared in 0.1 M NaOD (10 mg/mL) and preheated to 55°C for 2 h.

248 The molar ratio of the individual ribonucleotides could be determined from the  $^{31}\text{P}$  spectrum of  
249 the gel dissolved at high pH (Table 1). While several peaks could not be separated, it was  
250 possible to deduce that the RNA is purine rich (i.e. 57 mol% A+G) and that the G+C mol%  
251 content of 46-50% differs from that of the *P. aeruginosa* genome (i.e. 67 mol%) (Shen et al.,  
252 2006). The same peaks were also observed in the biofilm  $^{31}\text{P}$  spectrum after alkalization  
253 (Figure 3C(i)).

254 **Table 1:** Relative abundances of monoribonucleotides in extracellular NA gel isolate from *Pseudomonas*  
255 *aeruginosa* biofilm as determined by integrating  $^{31}\text{P}$  NMR spectrum following alkalization.

| $^{31}\text{P}$ shift (ppm) | Ribonucleotide | Relative abundance |
|-----------------------------|----------------|--------------------|
| 4.03                        | 3' AMP         | 18.0 %             |
| 4.01                        | 3' GMP         | 17.2 %             |
| 3.90                        | 3' CMP/3' UMP  | 8.9 %              |
| 3.87                        | 3' CMP/3' UMP  | 11.3 %             |
| 3.68                        | 2' CMP/2' UMP  | 9.5 %              |
| 3.66                        | 2' CMP/2' UMP  | 11.7 %             |
| 3.50                        | 2' AMP         | 10.4 %             |
| 3.42                        | 2' GMP         | 13.0 %             |

256

### 257 **Extracellular DNA and RNA interact to form a network.**

258 We applied Magic-angle spinning (MAS) solid-state NMR (SSNMR) to confirm that the  
259 networks in the gel isolate and biofilm are comprised of DNA and RNA in chain form. This  
260 technique is ideal for intractable systems such as biofilms to eliminate solubility and extraction  
261 biases (Reichhardt and Cegelski, 2014), and to analyze inter-molecular H-bond interactions to  
262 describe, for example, inter-nucleotide base pairing in RNA (Marchanka et al., 2015). MAS  
263 SSNMR averages anisotropic interactions to provide high-resolution spectral characterization of  
264 insoluble and large biomolecular systems. By analyzing dipolar interactions, through-space  
265 heteronuclear correlations (e.g.  $\text{N}\cdots\text{H}$ ) can be detected. In contrast to the liquid state  $^{31}\text{P}$  NMR  
266 spectrum of the alkali-dissolved isolate (Figure 3C (i)), the  $^{31}\text{P}$  SSNMR spectrum of the gel

267 isolate (i.e. no alkali treatment; Figure 4A (i)) showed a single peak in the diesterified phosphate  
268 region, consistent with the presence of both DNA and RNA chains. There are no sharp peaks  
269 present in the monoesterified phosphate region, further demonstrating that the  
270 monoribonucleotides are a consequence of alkali transesterification (Radak et al., 2013).

271 Only the diesterified phosphate peak was observed in the  $^{31}\text{P}$  SSNMR spectrum of the biofilm  
272 (Figure 4A (iii)), while both RNA-derived monoesterified and DNA-derived diesterified  
273 phosphate peaks were present in the  $^{31}\text{P}$  SSNMR spectrum of alkali digested NA gel-isolate and  
274 biofilm (lyophilized) (Figure 4A (ii) and Figure 4A (iv), respectively). Complete alkali RNA  
275 transesterification was confirmed by the full conversion of diesterified to monoesterified  
276 phosphates (from liquid state  $^{31}\text{P}$  NMR spectra) for the RNA standard, when dissolved in 0.1 M  
277 NaOH (Supplementary Figure 12A). Conversely, RNA diesterified phosphate peaks were  
278 preserved in the RNA standard spectrum following dissolution in EMIM-Ac and recovery by  
279 perchloric acid (Supplementary Figure 12B). Hence, the alkaline conditions break down the  
280 RNA chains into individual monoribonucleotides, while the ionic liquid-based extraction does  
281 not. This suggests that the conventional method for *P. aeruginosa* biofilm dissolution in alkali  
282 (Friedman and Kolter, 2004) may in fact work by transesterifying RNA as a primary structural  
283 component and illustrates the importance of the ionic liquid-based extraction protocol described  
284 here as a non-destructive method for interrogating biofilm structural polymers.

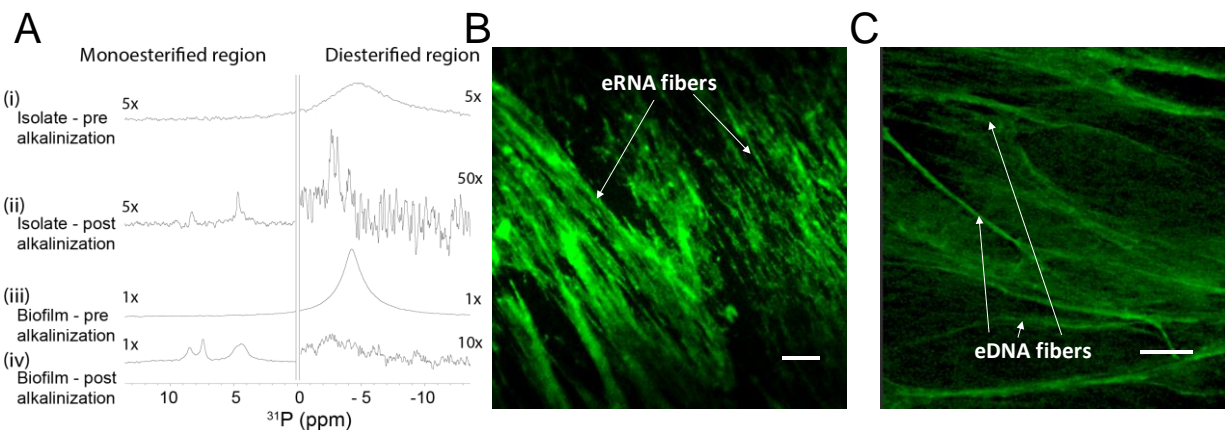

285

286 **Figure 4:** (A) Solid-state  $^{31}\text{P}$  NMR spectra at  $T = 25^\circ\text{C}$  of extracellular NA gel isolate (i), alkalized and  
287 lyophilized NA gel isolate (ii), *Pseudomonas aeruginosa* biofilm (iii) and alkalized and lyophilized *P. aeruginosa*  
288 biofilm (iv) showing the presence of diesterified phosphate peaks and the absence of monoesterified phosphate  
289 peaks for both NA gel isolate and biofilm in double distilled water, and the coexistence of diesterified and  
290 monoesterified phosphate peaks for both samples after alkalization. This indicates that alkalization of the matrix  
291 results in RNA transesterification. Micrographs of *P. aeruginosa* NA gel isolate stained green with (B) SYTO  
292 RNASelect showing RNA fibers and (C) TOTO-1 showing DNA fibers (scale bar 10  $\mu\text{m}$ ).

293

294 To visualize the DNA-RNA network organization, we used nucleic acid-specific stains, i.e. RNA  
295 specific SYTO RNASelect dye (Figure 4B) and the eDNA-specific TOTO-1 dye (Figure 4C)  
296 (Okshevsky and Meyer, 2014). Fibrous structures, which are typical of networked polymer gels  
297 (Cornwell and Smith, 2015), were observed in the NA gel isolate stained with both nucleic acid  
298 dyes as well as in the biofilm stained with the eDNA specific dye (Figure 1C). This is consistent  
299 with our observation that the biofilm is readily degraded by DNase I (Figure 1A) (Chen et al.,  
300 2004). Furthermore, the NA gel isolate was stained positively with the RNA-specific dye even  
301 after DNase I digestion, providing further evidence that RNA contributes to networking

302 (Supplementary Figure 13). However, digestion with RNases III, A and H, did not degrade the  
303 biofilm (Figure 1A; Supplementary Figure 14). This may suggest that the RNase binding was  
304 shielded by hairpins in the network, or the presence of non-canonical DNA-RNA interactions  
305 (Geerts-Dimitriadou et al., 2012; Nakamura et al., 1991).

### 306 **Non-canonical and Watson-Crick base pairs and tetrads support extracellular network.**

307 Sequence analysis of the extracted material indicated that the gene coverage was even for both  
308 chromosomal and extracellular DNA with the exception of bacteriophage Pf1 genes  
309 (Supplementary Figure 15). However, the Pf1 knockout mutant of *P. aeruginosa* also displayed  
310 an elastic response when dissolved in EMIM-Ac (Supplementary Figure 16, Supplementary  
311 Tables 1 and 2), indicating that Pf1 DNA is unlikely to be responsible for the phase-separating  
312 behavior of *P. aeruginosa* biofilms. DNA and RNA interaction therefore cannot be explained by  
313 uneven gene coverage. To elucidate the mechanism of DNA-RNA gelation, we generated a 2D,  
314 through-space,  $^{15}\text{N}$ - $^1\text{H}$  HETCOR spectrum of  $^{15}\text{N}$  labeled DNA-RNA gel isolated from a *P.*  
315 *aeruginosa* biofilm matrix (Figure 5A). This spectrum was run with longer cross polarization  
316 contact times so that correlations between distant  $^1\text{H}$  and  $^{15}\text{N}$  could be observed. This confirmed  
317 the complete absence of proteins and supported our conclusion that proteins do not contribute to  
318 the DNA-RNA interaction. The HETCOR spectrum showed four signal clusters at  $\delta_H$  10-14  
319 ppm, and  $\delta_N$  140-160 ppm (Figure 5A), which arose from direct N-H couplings of T/U and G  
320 nucleobase imino groups. Two of these clusters ( $\delta_H$  12-14 ppm) resulted from imino protons  
321 hydrogen-bonded to a nucleobase nitrogen (i.e. N-H $\cdots$ N), and the other two ( $\delta_H$  10 -12 ppm)  
322 from imino protons hydrogen-bonded to a nucleobase carbonyl oxygen (i.e. N-H $\cdots$ O). Due to the  
323 longer cross polarization times we were able to observe a strong, long-range and indirect (i.e.  
324 intermolecular) correlation at  $\delta_N$  196 ppm arising from G-C Watson-Crick base pairing, i.e.



325 C(N3)-G(H1). There was also a weak and indirect correlation at  $\delta_N$  220 ppm resulting from A-  
 326 T/U Watson-Crick base pairing, i.e. A(N1) to U/T(H1).

327

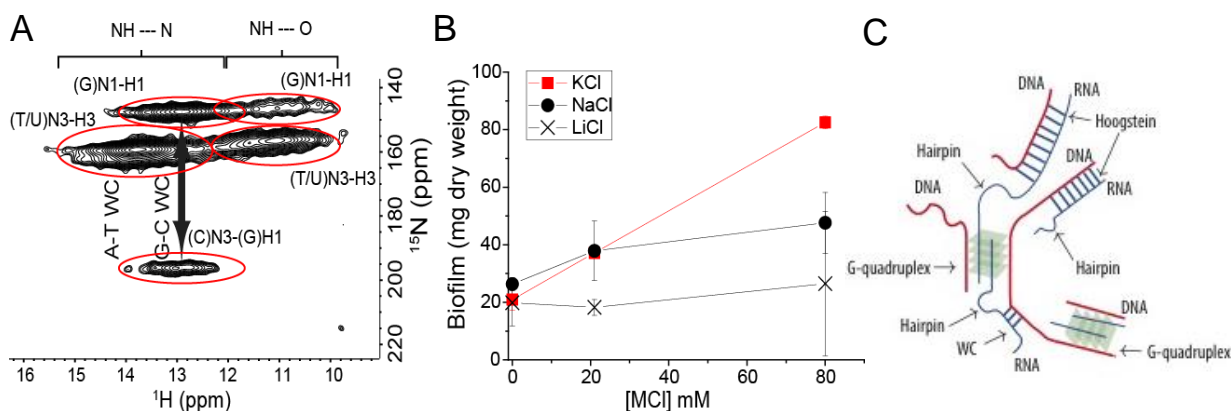

328

329 **Figure 5:** (A) Solid-state 2D  $^1\text{H}$ - $^{15}\text{N}$  through-space heteronuclear correlation (HETCOR) spectrum of extracellular  
 330 nucleic acid (NA) gel isolate in double distilled water (2 mg), T = 25°C showing direct N-H couplings for G imino  
 331 N (N3) and T/U imino N (N3) bonded to nucleobase nitrogen ( $\text{NH}\cdots\text{N}$ ). This indicates Watson-Crick (WC) G-C and  
 332 U/T-A base pairings respectively; and for G imino N (N1) and T/U imino N (N3) bonded to nucleobase carbonyl  
 333 oxygen (i.e.  $\text{NH}\cdots\text{O}$ ) indicating non-canonical G-G, G-T/U and U/T-U/T base pairings or tetrads. The spectrum also  
 334 displayed indirect N-H correlations for the WC base pairs (i.e. C(N3) to G(H1) and A(N1) to U/T(H1)) and no  
 335 indirect correlations for the non-canonical bonded nucleobases. The threshold for the A(N1)-T/U(H3) correlation  
 336 was increased due to lower signal intensity for that particular coupling. (B) *Pseudomonas aeruginosa* biofilm  
 337 growth yield at 37°C (5 d) as a function of  $[\text{K}^+]$ ,  $[\text{Na}^+]$  or  $[\text{Li}^+]$  showing the growth dependence on monovalent  
 338 cation concentration ( $\text{K}^+ > \text{Na}^+ > \text{Li}^+$ ). Error bars indicate standard deviation. (C) Illustration of how structural  
 339 variability of RNA may allow for the formation of extracellular RNA and DNA networks through hairpins and a  
 340 mixture of canonical and non-canonical base pairs or tetrads (i.e. Hoogsteen and G-quadruplexes).

341

342 The absence of long-range correlations between the clusters at  $\delta_H$  10 -12 ppm is consistent with  
 343 non-Watson-Crick pairings for the G and T/U nucleobases. The observation of NH to O  
 344 interactions suggests the formation of G-G, T/U-T/U, G-T/U Hoogsteen base pairs or tetrads.

345 Hoogsteen H-bonded G-bases can assemble planarly into tetrads and self-stack to form G-  
346 quadruplexes (Hänsel-Hertsch et al., 2017). G-quadruplexes are stabilized by the presence of a  
347 monovalent cation, with potassium providing the greatest stability. We experimentally confirmed  
348 that potassium had a similar effect in a static biofilm growth assay. We found that potassium  
349 promoted *P. aeruginosa* biofilm growth to a greater extent than either sodium or lithium (Figure  
350 5B). Additionally, this was a biofilm-specific effect as there was no effect of monovalent cation  
351 on planktonic growth (Supplementary Figure 17). Based on the SSNMR data coupled with the  
352 potassium effect and the earlier observation of several maxima in the CD spectrum of the NA gel  
353 isolate across the characteristic NA region of 250-285 nm, which suggested the coincidence of  
354 several NA conformations contributing to phase separation, it is proposed that G-quadruplexes  
355 contribute to extracellular DNA-RNA networking.

## 356 **Discussion**

357 We extracted a gel-forming complex composed of DNA and RNA from the extracellular matrix  
358 of *P. aeruginosa* biofilms without disrupting its fundamental structural or chemical organization.  
359 We report the novel observation that extracellular RNA contributes structurally to biofilms.  
360 While gel-forming exopolymers have been detected in other biofilms (Seviour et al., 2009), no  
361 functional DNA gel has been described for any biological system, much less one also including  
362 extracellular RNA.

363 While it is not possible to identify the precise nature of the DNA-RNA interaction based on the  
364 information presented here, purine-rich RNA as described here for the extracellular NA gel  
365 isolate (57 mol% A-G) is a characteristic of DNA-RNA duplexes because RNA purines bind  
366 more strongly to their DNA pyrimidine complement than vice versa (Nadel et al., 2015). Both  
367 Watson-Crick and non-canonical interactions were present in the NA gel isolate, which is also

368 consistent with the discrepancy observed between RNA and DNA G+C mol% contents (Table  
369 1). It is possible, therefore, that interactions between DNA and RNA, as described in this study,  
370 account for the formation of a highly stable nucleic acid gel.

371 Non-canonical base pairing and hairpinning are commonly seen with RNA and cause multivalent  
372 intermolecular interactions between RNA strands that lead to a sol-gel transition (Jain and Vale,  
373 2017). The greater structural versatility of RNA could be a key to the ability of the eDNA to  
374 form networks, with hairpins, as well as canonical and non-canonical base pair interactions all  
375 contributing to the assembly of higher order NA structures (Figure 5C). RNA has recently been  
376 found to promote intracellular phase separations, although this has not been extended to the  
377 extracellular domain of prokaryotic cells (Shin and Brangwynne, 2017). Additionally, G-rich  
378 RNA sequences are more predisposed to forming G-quadruplexes because they do not have a  
379 complementary strand and in fact form more stable G-quadruplexes than DNA (Guo and Bartel,  
380 2016). It is therefore probable that the RNA but not DNA enables DNA-RNA networking and  
381 gelation.

382 The results presented here provide unprecedented resolution of the biofilm exopolymeric matrix  
383 and its key foundation structural components. We have developed a methodology that preserved  
384 the molecular organization of the foundational polymer in its native state upon extraction and  
385 isolation. This enabled us to use SSNMR to describe intermolecular associations at the atomic  
386 level.

387 Our findings that a DNA-RNA gel network can provide the foundation for biofilm matrices in *P.*  
388 *aeruginosa* mark a departure from the prevailing paradigm that biofilm gelation is only due to  
389 polysaccharides. The elastic and film-forming properties were also observed for *Pseudomonas*  
390 *putida* and *Pseudomonas protegens* (Figs. S16 and S18; Supplementary Tables 1 and 2)

391 suggesting that eDNA is broadly important for biofilm formation in members of this genus. In  
392 addition to *Pseudomonas* spp., other organisms are known to have eDNA, including clinical  
393 organisms *Staphylococcus aureus* (Mann et al., 2009), *Staphylococcus epidermidis* (Adam et al.,  
394 2002), and *Mycobacterium abscessus* (Rose et al., 2015) as well as environmental isolates such  
395 as strain F8 from the South Saskatchewan River (Böckelmann et al., 2006).

396 While eDNA is commonly thought to be the product of cell lysis, and has been shown to be  
397 released by a sub-population of lytic *P. aeruginosa* cells (Turnbull et al., 2016), there is an  
398 increasing awareness that it serves an important structural function, such as in activated sludge  
399 granules (Cheng et al., 2011). Additionally, Bockelmann et al. (2006) observed that stable  
400 filamentous networks produced by the aquatic strain F8 were comprised of DNA. This is the first  
401 study that provides an explanation for how eDNA is organized structurally. However, the  
402 environmental factors contributing to eDNA release and how this is regulated (i.e. whether it is  
403 an active or passive process) are still unclear. It is possible that DNA-RNA foundational gel  
404 networks, as described here for the Pseudomonads, are broad-scoping phenomena in biofilms,  
405 and that interactions with RNA enable an extracellular structural function for DNA. Thus,  
406 elucidating how nucleic acids, including RNA, are integral to the biophysical and other emergent  
407 properties imparted on the biofilm via the extracellular matrix, will inform the regulation and  
408 control of extracellular nucleic acid release across environmental and clinical biofilms.

## 409 **Materials and Methods**

### 410 **Bacterial strains**

411 Unless otherwise stated, all experiments were undertaken directly on *P. aeruginosa* PAO1  
412 biofilms grown in lysogeny broth at 37°C. The *P. aeruginosa* PAO1  $\Delta pf4$  knockout mutant is a

413 defined Pf4 chromosomal deletion mutant of the entire Pf4 prophage genome (Rice et al.,  
414 2009).  
415 *P. aeruginosa* PDO300, PDO300( $\Delta pel$ ) and PDO300( $\Delta psl$ ) mutant strains were gratefully  
416 received from Professor Bernd H. A. Rehm, Institute of Molecular Biosciences, Massey  
417 University, New Zealand (Ghafoor et al., 2011). PDO300, PDO300( $\Delta pel$ ), PDO300( $\Delta psl$ ) and  
418 PAO1 ( $\Delta pfl4$ ), were also grown in LB at 37°C. *P. protogens Pf-5* and *P. putida* ATCC BAA-477  
419 and S12 strain were grown in LB at 30°C.

#### 420 **Biofilm growth assay**

421 Ten milliliter aliquots of *P. aeruginosa* planktonic pre-cultures (LB, 200 rpm, 37°C, OD<sub>600</sub> 2.40,  
422 16 h) were diluted 50 times with LB in 2 L Erlenmeyer flasks and incubated for 5 d under static  
423 conditions. Supplementary Figure 15A displays an image of 5-d old biofilm in LB. The cultures  
424 were centrifuged at 10,000 x g for 15 min, the supernatant removed by decanting, and the  
425 biofilm then collected and lyophilized (LabConco). Supplementary Figure 15B displays an  
426 image of the culture after centrifugation showing clear separation of biofilm and supernatant.

#### 427 **Enzymatic digestions**

428 Twenty milligrams of lyophilized biofilm was resuspended in 1 mL of either i) RNase buffer (50  
429 mM Tris HCl, 10 mM EDTA, pH8) with 0.2 mg RNaseA from bovine pancreas (Sigma Aldrich),  
430 ii) storage buffer (10 mM NaCl, 10 mM Tris-HCl) with 0.1 mg Pronase E from *Streptomyces*  
431 *grisens* (Sigma Aldrich) with 0.5% (v/v), iii) 1X RNase H reaction buffer (20 mM Tris-HCl pH  
432 7.8, 40 mM KCl, 8 mM MgCl<sub>2</sub>, 1 mM DTT) with 0.4 mg RNase H (Thermo Fisher Scientific),  
433 iv) 1X RNase III reaction buffer (500 mM NaCl, 100 mM Tris pH 7.9, 100 mM MgCl<sub>2</sub>, 10 mM  
434 DTT) with 0.6 mg RNase II (Thermo Fisher Scientific) or v) DNase I buffer (100mM Tris (pH  
435 7.5), 25 mM MgCl<sub>2</sub> and CaCl<sub>2</sub>) with 0.2 mg DNase I from bovine pancreas (Sigma Aldrich). All

436 digestions were performed with shaking at 200 rpm at 37°C for 16 h. The suspensions were then  
437 centrifuged (10,000 x g, 15 min), the supernatant was discarded and the pellets of the biofilm  
438 materials were lyophilized.

### 439 **Normal force measurement**

440 Forty milligrams per milliliter solutions of lyophilized biofilms were added to 1 mL 1-ethyl-3-  
441 methylimidazolium acetate and incubated in 55°C for either 2 h. A Haake Mars 3 (Thermo  
442 Fisher Scientific) stress-controlled rotational rheometer with Peltier controlled element at 25°C,  
443 was used for rheological measurements. Thirty five-millimeter diameter parallel plate geometry  
444 was used with smooth titanium plates to measure viscosity and normal stress difference ( $N_1 -$   
445  $N_2$ ). Prior to measurement the gap error was zeroed at 4 N and gap error calculated as previously  
446 described (Bird et al., 1987; Davies and Stokes, 2008; Kravchuk and Stokes, 2013). One  
447 hundred microliters of sample was deposited on the plates. The plates were closed to 100  $\mu\text{m}$ , the  
448 sample trimmed and the sample allowed to sit for 5 min prior to measurement. All measurements  
449 with Normal force ( $F_N$ ) less than the resolution of the rheometer (i.e. < 0.1 N) were set to 0  
450 before calculation of  $N_1 - N_2$  using equations 9-11, and viscosity from equation 3-5 in Davies and  
451 Stokes (Davies and Stokes, 2008) for the parallel plate geometry.

452 Only the linearly increasing portion of the normal stress difference curves are presented. Above  
453 this range normal stress difference begins to decrease again which may be due to elastic  
454 instabilities or associating polymers (Annable et al., 1993). Corrections were made to  $N_1$  and  $N_1$   
455  $- N_2$  to account for inertia using equation 17 in Davies and Stokes (Davies and Stokes, 2008) and  
456 to correct for the baseline residual force in the samples. Except for the DNase I-treated biofilm,  
457 the shear rheology for all treatments could be modelled using the finitely extensible non-linear  
458 elastic with Gaussian closure proposed by Peterlin (FENE-P) constitutive model by varying four

459 parameters to fit shear viscosity and normal stress difference as a function of shear rate  
460 (Supplementary Table 2). Fitting parameters for the FENE-P model include  $\lambda_1$  = relaxation time,  
461  $b$  = a measure of the relative extensibility of the model spring,  $\eta_s$  = solvent viscosity,  $\eta_p$  =  
462 polymer contribution to the viscosity. The FENE-P equations can be written in the following  
463 format, as shown by Bird et al.(1987):

$$464 \quad \eta = \eta_s + \frac{\eta_p}{\lambda_1 \dot{\gamma}} \left( (C_2 + C_1)^{\frac{1}{3}} - (C_2 - C_1)^{\frac{1}{3}} \right) \quad (\text{Equation 1})$$

465

$$466 \quad N_1 = \frac{2\eta_p}{\lambda_1} \left( (C_2 + C_1)^{\frac{1}{3}} - (C_2 - C_1)^{\frac{1}{3}} \right)^2 \quad (\text{Equation 2})$$

467 Where:

$$468 \quad C_1 = \frac{b}{4} \lambda_1 \dot{\gamma} \quad (\text{Equation 3})$$

$$469 \quad C_2 = \left( C_1^2 + \left( \frac{b+3}{6} \right)^3 \right)^{1/2} \quad (\text{Equation 4})$$

470

471 All measurements were performed in triplicate. For clarity, one representative data set is  
472 presented in Figure 1A-B and Supplementary Figure 1A-B, with the respective Power Law and  
473 FENE-P model fit to that data set. Averaged values for the FENE-P and Power law fits, with the  
474 standard deviation across three replicates are shown in Supplementary Tables 1 and 2.  
475 Oscillatory measurements were carried out with controlled frequency 0.1 rad/s across an  
476 amplitude range of 0.01 to 10 %.

### 477 **Extracellular polymeric substances (EPS) extraction**

478 Lyophilized biofilms were dissolved in ionic liquid mixture (40% (v/v) 1-ethyl-3-  
479 methylimidazolium acetate (EMIM Ac): 60% (v/v) N,N-dimethyl acetamide (DMAc)) at 55°C

480 for 16 h. The solution was centrifuged (10,000 x g) to remove any undissolved material.  
481 Perchloric acid (70%) was added (0.05% v/v) to the viscosified centrate (on ice). After 15 min  
482 incubation, the solution was centrifuged at 10,000 x g at 4°C for 15 min and the pellet recovered.  
483 This was repeated on the centrate two to four times until the solution was not viscous. The  
484 precipitate was dialysed against double distilled water for 2 d at 4°C (SnakeSkin™ Dialysis  
485 Tubing, 3.5K MWCO, 22 mm) and the retentate lyophilized (FreeZone Plus 4.5 Liter Cascade  
486 Benchtop Freeze Dry System). The same procedure was performed on calf thymus DNA, lipase,  
487 cytochrome C for the purposes of determining recovery yield of representative exoproteins, and  
488 on RNA from torula yeast for assessing by <sup>31</sup>P NMR whether the extraction procedure  
489 contributed to RNA transesterification (all from Sigma Aldrich).

#### 490 **Extracellular nucleic acid isolation**

491 Twenty milligrams of lyophilized retentate (i.e. post perchloric acid precipitation) were dissolved  
492 in 1 mL of 40% (v/v) EMIM-Ac, 60% DMAc (v/v) (55°C, 16 h). Chromatographic separation  
493 was achieved in a Shimadzu system comprising DGU-20A 3r Prominence Degasser and LC-  
494 20AD Solvent Delivery Unit, fitted with two Agilent PLgel 10 µm column of 10<sup>5</sup>Å pore size for  
495 separation across the MW range 200 kDa to 2000 kDa. The eluent flow rate was 3.0 mL.min<sup>-1</sup>  
496 and the injection volume 1 mL. The fractions with molecular weight range of 2000-800kDa and  
497 800-200kDa were pooled and dialyzed for 2 d at 4°C (SnakeSkin™ Dialysis Tubing, 3.5K  
498 MWCO, 22 mm) against double distilled water to induce gelation. The gel was then collected  
499 from the dialysis tubing.

#### 500 **Solution-state nuclear magnetic resonance (NMR)**

501 Solution-state NMR experiments were performed on an 800 MHz Bruker Avance III  
502 spectrometer at 25°C. Sample concentration was 10 mg (dry weight).mL<sup>-1</sup> unless otherwise



503 specified. Spectra were recorded either under conditions of neutral pH in 100% D<sub>2</sub>O (Cambridge  
504 Isotope Laboratories), or following alkalization (i.e. transesterification, 0.1 M NaOD, 55°C, 2  
505 h). 1-D NMR experiments include <sup>1</sup>H and <sup>31</sup>P direct detection, while 2-D NMR analysis include  
506 <sup>13</sup>C-HSQC, <sup>13</sup>C-HSQC-TOCSY, <sup>1</sup>H-<sup>31</sup>P HETCOR, HMBC, and COSY. All spectral analyses  
507 were performed using Topspin and SPARKY software.

508 Asolectin (Sigma Aldrich) standard (10 mg/mL) and lyophilized *Pseudomonas aeruginosa*  
509 PAO1 biofilm (10mg/mL) were dissolved in 40% (v/v) EMIM Ac: 60% (v/v) DMAc at (55°C, 2  
510 h). *P. aeruginosa* PAO1 pre-culture cell lysate was prepared by lysing pre-culture cells with  
511 lysozyme in PBS. 10% (v/v) of D<sub>2</sub>O was added to all samples for locking purposes.

## 512 **Solid-state NMR**

513 For solid-state NMR experiments performed on the NA gel isolate, <sup>15</sup>N labeled NH<sub>4</sub>Cl-  
514 supplemented M9 minimal media was used for biofilm growth. M9 consisted of 9.552 g.L<sup>-1</sup>  
515 Na<sub>2</sub>HPO<sub>4</sub>·2H<sub>2</sub>O, 4.41g litre<sup>-1</sup> KH<sub>2</sub>PO<sub>4</sub>, 1.71 g.L<sup>-1</sup> NaCl, 1 g.L<sup>-1</sup> <sup>15</sup>NH<sub>4</sub>Cl, 0.24 g.L<sup>-1</sup> MgSO<sub>4</sub>,  
516 0.011 g.L<sup>-1</sup> CaCl<sub>2</sub>, 2 g.L<sup>-1</sup> casamino acids, and 0.4 g.L<sup>-1</sup> glucose. The NA gel was prepared from  
517 the M9-grown *P. aeruginosa* PAO1 biofilm as described above.

518 Solid-state NMR experiments were performed on 14.1 T Bruker Advance III instruments  
519 equipped with a 1.9 mm MAS probe operated in double mode. The typical <sup>1</sup>H, <sup>15</sup>N and <sup>31</sup>P  $\pi/2$   
520 pulse lengths were 2.3, 3.7, and 4.5  $\mu$ s, respectively. 2D dipolar-based <sup>15</sup>N-<sup>1</sup>H heteronuclear-  
521 correlation (HETCOR) experiments were conducted on the <sup>15</sup>N-labelled NA gel isolate at 37 kHz  
522 MAS spinning frequency. Variable temperature was regulated at -20°C and the sample  
523 temperature was 12°C (calibrated using ethylene glycol). In the <sup>15</sup>N-<sup>1</sup>H HETCOR experiments,  
524 the initially excited <sup>1</sup>H magnetization was transferred to <sup>15</sup>N through a cross polarization step  
525 followed by t1 evolution. Then, the <sup>15</sup>N magnetization was flipped to longitudinal axis and 400

526 ms proton saturation pulses were applied for water suppression. Subsequently, the  $^{15}\text{N}$   
527 magnetization was flipped to the transverse plane and transferred to  $^1\text{H}$  via a second CP step for  
528 signal acquisition. Two  $^{15}\text{N}$ - $^1\text{H}$  HETCOR experiments were collected, one with 400  $\mu\text{s}$  and the  
529 other with 2 ms contact times applied for both of the CP steps. Low power XiX  $^1\text{H}$  decoupling  
530 ( $\sim 10$  kHz) was employed during  $^{15}\text{N}$  evolution and WALTZ-16 decoupling (10 kHz) was  
531 implemented on  $^{15}\text{N}$  channel during  $^1\text{H}$  acquisition.

532 1-D  $^{31}\text{P}$  experiments were performed on  $^{15}\text{N}$ -labelled NA gel isolate and  $^{15}\text{N}$ -labelled *P.*  
533 *aeruginosa* PAO biofilm, both directly after dialysis against double distilled water at  $4^\circ\text{C}$  for 2 d  
534 (SnakeSkin™ Dialysis Tubing, 3.5K MWCO, 22 mm), and following alkalization (0.1 M  
535 NaOD,  $55^\circ\text{C}$ , 15 min) and lyophilization (FreeZone Plus 4.5 Liter Cascade Benchtop Freeze Dry  
536 System). 15 kHz MAS spinning frequency and a sample temperature of  $27^\circ\text{C}$ . 75 kHz  
537 SPINAL64  $^1\text{H}$  decoupling was applied during  $^{31}\text{P}$  acquisition time. All chemical shifts were  
538 indirectly referenced using adamantane as a secondary standard (downfield peak is at 40.48 ppm,  
539 DSS scale).

#### 540 **Monovalent cation-dependent biofilm growth**

541 Ten milliliters aliquots of *P. aeruginosa* pre-cultures (supplemented M9, 200 rpm,  $\text{OD}_{600}$  2.40,  
542 16 h) were transferred into 500 mL M9 minimal media ( $8.5 \text{ g.L}^{-1} \text{ Na}_2\text{HPO}_4 \cdot 2\text{H}_2\text{O}$ ,  $2.0 \text{ g.L}^{-1}$  of  
543  $\text{NaH}_2\text{PO}_4 \cdot \text{H}_2\text{O}$ ,  $1.0 \text{ g.L}^{-1} \text{ KH}_2\text{PO}_4$ ,  $1.0 \text{ g.L}^{-1} \text{ NH}_4\text{Cl}$ ,  $0.48 \text{ g.L}^{-1} \text{ MgSO}_4$ ,  $0.011 \text{ g.L}^{-1} \text{ CaCl}_2$ ,  $2 \text{ g.L}^{-1}$   
544 casamino acids, and  $0.4 \text{ g.L}^{-1}$  glucose) supplemented with either KCl, LiCl or NaCl at either of  
545 three different concentrations (0, 0.02 mM and 0.08 mM). Biofilms were collected by  
546 centrifugation ( $10,000 \times g$ , 15 min) as described above, lyophilized (LabConco) and weighed. To  
547 describe the growth curve, *P. aeruginosa* wild type PAO1 pre-culture was incubated in M9  
548 media at  $37^\circ\text{C}$ , 200 rpm for 16 h. PAO1 WT pre-culture was then diluted with supplemented M9

549 media to a volume of 75 mL and a starting OD<sub>600</sub> of 0.01, in a 250 mL Erlenmeyer flask. The  
550 mixture was incubated at 37°C with shaking (200rpm). The OD<sub>600</sub> of the bacteria was measured  
551 hourly for 9 h followed by final time point at 24 h.

## 552 **DNA Sequencing**

553 Genomic DNA was extracted from the biofilm using FastDNA SPIN Kit for soil (MP  
554 Biomedicals, USA) as per the standard protocol. Briefly, biofilm was resuspended in Sodium  
555 Phosphate Buffer in was lysed (Lysing Matrix), homogenized (FastPrep<sup>®</sup>, 40 seconds, speed  
556 setting 6.0), and the cell debris removed by centrifugation (14,000 x g, 5 min). Proteins were  
557 removed by precipitation (250 µl Protein Precipitation Solution), the supernatant mixed with  
558 DNA Binding Matrix, which was then homogenized and transferred to a SPIN<sup>™</sup> Filter. Excess  
559 supernatant was removed by centrifugation (14,000 x g, 5 min). DNA was then eluted from air  
560 dried DNA Binding Matrix with DNase/ Pyrogen-Free Water.

561 The NA gel isolate was resuspended in 500 uL of 1x Protease K solution (10× Protease K  
562 solution: 10 mM Tris HCl, 1% SDS and 10 mM EDTA, pH 8 buffer (10× protease K buffer  
563 containing 500 mM Tris-HCl, 10% SDS, 10 mM CaCl<sub>2</sub>) and 10 µL of Protease K (20 mg.mL<sup>-1</sup>,  
564 Thermo Fisher Scientific) was added and the mixture incubated at 56°C for 2-16 h, after which  
565 DNA was extracted as previously described in the phenol-chloroform method(Ausubel, 2002).  
566 Samples before sequencing were further purified to remove any remaining protein and RNA by  
567 RNase and Proteinase K treatment. The DNA was then isolated using phenol-chloroform  
568 precipitation as described above. The DNA precipitate was dissolved in TE buffer, the purity  
569 confirmed by 260/280 value in Nanodrop (acceptable range value: 1.8-2.0) and Qubit<sup>®</sup> 2.0  
570 fluorometer.

571 The molecular weight distributions of extracellular and genomic DNA were measured on a 1%  
572 agarose gel, which was prepared from Vivantis LE grade agarose using 1x TAE buffer (40 mM  
573 Tris, 20 mM Acetate and 1 mM EDTA, pH 8.6). Gels were run horizontally. After  
574 electrophoresis, the gel was stained for 0.5 h with ethidium bromide and visualized under  
575 UV(Lee et al., 2012).

576 Three replicates were used for each DNA sequence analysis. Library was produced using  
577 Illumina DNA sample preparation kit. The libraries were sequenced using Illumina MiSeq  
578 platform (Illumina, San Diego, Ca) with paired-end protocol to read lengths of 600 nt generating  
579 a total of 1,614,106 and 1,848,846 paired end reads. Raw reads were quality filtered (reads  
580 remaining after trimming: PPG1-1549104, PBLC1-1666280) and aligned to the *P. aeruginosa*  
581 PAO1 (AE004091) genome using CLC Genomics Workbench 9.0 (CLC bio, Cambridge, MA).

## 582 **Circular Dichroism CD**

583 Five-day old biofilm and NA gel isolate were resuspended in double distilled water to achieve  
584 UV absorbance reading 1 and ddH<sub>2</sub>O served as a blank. The heat-treated samples were analyzed  
585 by JASCO-815 spectropolarimeter in a 1 cm path length quartz cuvette containing a solution  
586 volume 500  $\mu$ L. Spectra (200-320 nm) were measured at 1°C increments from 30 - 90°C. For  
587 each measurement, an average of three scans was taken and the buffer spectra subtracted. Each  
588 spectrum presented is the rolling average across 5 temperatures.

## 589 **Staining and microscopy**

590 Microscopic imaging was conducted on a confocal microscope Zeiss LSM 780 with a 63 $\times$   
591 objective. Extracellular RNA in the gel isolate were stained using SYTO RNASelect (Thermo  
592 Fisher Scientific) green fluorescent cell stain (5 mM solution in DMSO). Five  $\mu$ M stain solution  
593 was prepared from 1  $\mu$ L of stock in 1X PBS solution (137 mM NaCl, 2.7 mM KCl, 4.3 mM

594  $\text{Na}_2\text{HPO}_4$ , 1.47 mM  $\text{KH}_2\text{PO}_4$ ). The gel isolate was labelled with 5  $\mu\text{M}$  stain solution, kept at  
595 37°C for 20 min and then transferred to glass side for imaging.

596 eDNA staining was achieved by depositing biofilm or NA gel isolate on a glass slide, air-drying  
597 overnight and incubating with 2  $\mu\text{M}$  TOTO-1 iodide (1 mM solution in DMSO, Thermo Fisher  
598 Scientific) for 15 min.

## 599 **Acknowledgments**

600 We acknowledge Prof Bernd Rehm for supplying polysaccharide deletion mutants of *P.*  
601 *aeruginosa*, Dan Roizman for providing *P. putida*, Long Yu for assistance with rheology, Dr  
602 Gleb Yakubov for coordinating sample preparation for rheological measurements, Ravi  
603 Jagadeeshan for discussion regarding DNA normal force analysis, and Florentin Constancias for  
604 analyzing the sequencing data. SCELSE is funded by Singapore's Ministry of Education,  
605 National Research Federation, Nanyang Technological University (NTU), and National  
606 University of Singapore (NUS) and hosted by NTU in partnership with NUS.

## 607 **Author Contributions**

608 T.S., F.R.W., W.L.L., S.M., H.M.S. and X.S. performed experiments; T.S. and A.T.P. designed  
609 the experiments. T.S., F.R.W., A.T.P., H.M.S., G.S.K. and J.R.S. analysed the data. T.S.,  
610 F.R.W., W.L.L., H.M.S., S.A.R., A.T.P and S.K. wrote the manuscript.

## 611 **Competing Interests**

612 All authors have no competing interests.

## 613 **References**

614 **Mixed species biofilms of *Candida albicans* and *Staphylococcus epidermidis***  
615 B Adam, GS Baillie, LJ Douglas (2002)

- 616 *Journal of Medical Microbiology* **51**:344-349.  
617 doi:10.1099/0022-1317-51-4-344
- 618 **A characterization of DNA release in *Pseudomonas aeruginosa* cultures and biofilms**  
619 M Allesen-Holm, KB Barken, L Yang, M Klausen, JS Webb, S Kjelleberg, S Molin, M Givskov, T Tolker-Nielsen  
620 (2006)  
621 *Molecular Microbiology* **59**:1114-1128.  
622 doi:10.1111/j.1365-2958.2005.05008.x
- 623 **The rheology of solutions of associating polymers: Comparison of experimental behavior with transient**  
624 **network theory**  
625 T Annable, R Buscall, R Ettelaie, D Whittlestone (1993)  
626 *Journal of Rheology* **37**:695-726.  
627 doi:10.1122/1.550391
- 628 **Short protocols in molecular biology : a compendium of methods from Current protocols in molecular**  
629 **biology**  
630 FM Ausubel (2002)  
631 5th ed. New York: Wiley.
- 632 **Dynamics of Polymeric Liquids**  
633 RB Bird, RC Armstrong, O Hassager (1987)  
634 2nd ed.
- 635 **Bacterial extracellular DNA forming a defined network-like structure**  
636 U Böckelmann, A Janke, R Kuhn, TR Neu, J Wecke, JR Lawrence, U Szewzyk (2006)  
637 *FEMS Microbiology Letters* **262**:31-38.  
638 doi:10.1111/j.1574-6968.2006.00361.x
- 639 **Infections caused by *Pseudomonas aeruginosa***  
640 GP Bodey, R Bolivar, V Fainstein, L Jadeja (1983)  
641 *Review of Infectious Diseases* **5**:279-313.  
642 doi:10.1093/clinids/5.2.279
- 643 ***Pseudomonas aeruginosa* uses a cyclic-di-GMP-regulated adhesin to reinforce the biofilm extracellular matrix**  
644 BR Borlee, AD Goldman, K Murakami, R Samudrala, DJ Wozniak, MR Parsek (2010)  
645 *Molecular Microbiology* **75**:827-842.  
646 doi:10.1111/j.1365-2958.2009.06991.x
- 647 **DNA/RNA helicase gene mutations in a form of juvenile amyotrophic lateral sclerosis (ALS4)**  
648 YZ Chen, CL Bennett, HM Huynh, IP Blair, I Puls, J Irobi, I Dierick, A Abel, ML Kennerson, BA Rabin, GA  
649 Nicholson, M Auer-Grumbach, K Wagner, P De Jonghe, JW Griffin, KH Fischbeck, V Timmerman, DR Cornblath,  
650 PF Chance (2004)  
651 *Am J Hum Genet* **74**:1128-1135.  
652 doi:10.1086/421054
- 653 **Evidence of compositional differences between the extracellular and intracellular DNA of a granular sludge**  
654 **biofilm**  
655 M Cheng, AE Cook, T Fukushima, PL Bond (2011)  
656 *Letters in Applied Microbiology* **53**:1-7.  
657 doi:doi:10.1111/j.1472-765X.2011.03074.x
- 658 **Dynamic Remodeling of Microbial Biofilms by Functionally Distinct Exopolysaccharides**  
659 SC Chew, B Kundukad, T Seviour, JRC Van Der Maarel, L Yang, SA Rice, P Doyle, S Kjelleberg (2014)  
660 *mBio* **5**:e01536-01514.  
661 doi:10.1128/mBio.01536-14
- 662 **The Pel and Psl polysaccharides provide *Pseudomonas aeruginosa* structural redundancy within the biofilm**  
663 **matrix**  
664 KM Colvin, Y Irie, CS Tart, R Urbano, JC Whitney, C Ryder, PL Howell, DJ Wozniak, MR Parsek (2012)  
665 *Environmental Microbiology* **14**:1913-1928.  
666 doi:10.1111/j.1462-2920.2011.02657.x
- 667 **Expanding the scope of gels - Combining polymers with low-molecular-weight gelators to yield modified self-**  
668 **assembling smart materials with high-tech applications**  
669 DJ Cornwell, DK Smith (2015)  
670 *Materials Horizons* **2**:279-293.  
671 doi:10.1039/c4mh00245h

- 672 **Thin film and high shear rheology of multiphase complex fluids**  
673 GA Davies, JR Stokes (2008)  
674 *Journal of Non-Newtonian Fluid Mechanics* **148**:73-87.  
675 doi:10.1016/j.jnnfm.2007.04.013
- 676 **Kinetic model of a granular sludge SBR: Influences on nutrient removal**  
677 MK De Kreuk, C Picioreanu, M Hosseini, JB Xavier, MCM Van Loosdrecht (2007)  
678 *Biotechnology and Bioengineering* **97**:801-815.  
679 doi:10.1002/bit.21196
- 680 **G-Quadruplex secondary structure obtained from circular dichroism spectroscopy**  
681 R Del Villar-Guerra, JO Trent, JB Chaires (2018)  
682 *Angewandte Chemie International Edition* **57**:7171-7175.  
683 doi:10.1002/anie.201709184
- 684 **Biofilm streamers cause catastrophic disruption of flow with consequences for environmental and medical systems**  
685 K Drescher, Y Shen, BL Bassler, HA Stone (2013)  
686 *Proceedings of the National Academy of Sciences of the United States of America* **110**:4345-4350.  
688 doi:10.1073/pnas.1300321110
- 689 **The biofilm matrix**  
690 H-C Flemming, J Wingender (2010)  
691 *Nature Reviews Microbiology* **8**:623-633.  
692 doi:10.1038/nrmicro2415
- 693 **Two genetic loci produce distinct carbohydrate-rich structural components of the *Pseudomonas aeruginosa* biofilm matrix**  
694 L Friedman, R Kolter (2004)  
695 *Journal of Bacteriology* **186**:4457-4465.  
697 doi:10.1128/jb.186.14.4457-4465.2004
- 698 **Analysis of the Tomato spotted wilt virus Ambisense S RNA-Encoded Hairpin Structure in Translation**  
699 C Geerts-Dimitriadou, Y-Y Lu, C Geertsema, R Goldbach, R Kormelink (2012)  
700 *PLOS ONE* **7**:e31013.  
701 doi:10.1371/journal.pone.0031013
- 702 **Role of exopolysaccharides in *Pseudomonas aeruginosa* biofilm formation and architecture**  
703 A Ghafoor, ID Hay, BHA Rehm (2011)  
704 *Applied and Environmental Microbiology* **77**:5238-5246.  
705 doi:10.1128/aem.00637-11
- 706 **Using circular dichroism spectra to estimate protein secondary structure**  
707 NJ Greenfield (2006)  
708 *Nature protocols* **1**:2876-2890.  
709 doi:10.1038/nprot.2006.202
- 710 **RNA G-quadruplexes are globally unfolded in eukaryotic cells and depleted in bacteria**  
711 JU Guo, DP Bartel (2016)  
712 *Science* **353**:aaf5371.  
713 doi:10.1126/science.aaf5371
- 714 **DNA G-quadruplexes in the human genome: detection, functions and therapeutic potential**  
715 R Hänsel-Hertsch, M Di Antonio, S Balasubramanian (2017)  
716 *Nature Reviews Molecular Cell Biology* **18**:279.  
717 doi:10.1038/nrm.2017.3
- 718 **Major proteomic changes associated with amyloid-induced biofilm formation in *Pseudomonas aeruginosa* PAO1**  
719 F-A Herbst, MT Søndergaard, H Kjeldal, A Stensballe, PH Nielsen, MS Dueholm (2015)  
720 *Journal of Proteome Research* **14**:72-81.  
721 doi:10.1021/pr500938x
- 722 **Antibiotic resistance of bacterial biofilms**  
723 N Høiby, T Bjarnsholt, M Givskov, SR Molin, O Ciofu (2010)  
724 *International Journal of Antimicrobial Agents* **35**:322-332.  
725 doi:10.1016/j.ijantimicag.2009.12.011
- 726 **Self-produced exopolysaccharide is a signal that stimulates biofilm formation in *Pseudomonas aeruginosa***

- 728 Y Irie, BR Borlee, JR O'connor, PJ Hill, CS Harwood, DJ Wozniak, MR Parsek (2012)  
729 *Proceedings of the National Academy of Sciences of the United States of America* **109**:20632-20636.  
730 doi:10.1073/pnas.1217993109
- 731 **RNA phase transitions in repeat expansion disorders**  
732 A Jain, RD Vale (2017)  
733 *Nature* **546**:243-247.  
734 doi:10.1038/nature22386
- 735 **Pel is a cationic exopolysaccharide that cross-links extracellular DNA in the *Pseudomonas aeruginosa* biofilm matrix**  
736 LK Jennings, KM Storek, HE Ledvina, C Coulon, LS Marmont, I Sadovskaya, PR Secor, BS Tseng, M Scian, A Filloux, DJ Wozniak, PL Howell, MR Parsek (2015)  
738 *Proceedings of the National Academy of Sciences of the United States of America* **112**:11353-11358.  
739 doi:10.1073/pnas.1503058112
- 741 **A phenomenological model for predicting melting temperatures of DNA sequences**  
742 G Khandelwal, J Bhyravabhotla (2010)  
743 *PLOS ONE* **5**:e12433.  
744 doi:10.1371/journal.pone.0012433
- 745 **Review of algorithms for estimating the gap error correction in narrow gap parallel plate rheology**  
746 O Kravchuk, JR Stokes (2013)  
747 *Journal of Rheology* **57**:365-375.  
748 doi:10.1122/1.4774323
- 749 **Analysis of the ion adsorption–desorption characteristics of biofilm matrices**  
750 A Kurniawan, T Yamamoto, Y Tsuchiya, H Morisaki (2012)  
751 *Microbes and Environments* **27**:399-406.  
752 doi:10.1264/jsme2.ME11339
- 753 **Circular dichroism and conformational polymorphism of DNA**  
754 J Kypr, I Kejnovská, D Renčiuk, M Vorlíčková (2009)  
755 *Nucleic Acids Research* **37**:1713-1725.  
756 doi:10.1093/nar/gkp026
- 757 **Agarose gel electrophoresis for the separation of DNA fragments**  
758 PY Lee, J Costumbrado, C-Y Hsu, YH Kim (2012)  
759 *Journal of Visualized Experiments : JoVE* 3923.  
760 doi:10.3791/3923
- 761 **Modulation of eDNA release and degradation affects *Staphylococcus aureus* biofilm maturation**  
762 EE Mann, KC Rice, BR Boles, JL Endres, D Ranjit, L Chandramohan, LH Tsang, MS Smeltzer, AR Horswill, KW Bayles (2009)  
763 *PLoS One* **4**:e5822.  
764 doi:10.1371/journal.pone.0005822
- 766 **Persistent draining crossover in DNA and other semi-flexible polymers: Evidence from hydrodynamic models and extensive measurements on DNA solutions**  
767 ML Mansfield, A Tsortos, JF Douglas (2015)  
768 *The Journal of Chemical Physics* **143**:124903.  
769 doi:10.1063/1.4930918
- 771 **RNA structure determination by solid-state NMR spectroscopy**  
772 A Marchanka, B Simon, G Althoff-Ospelt, T Carlomagno (2015)  
773 *Nature Communications* **6**:7024.  
774 doi:10.1038/ncomms8024
- 775 **RNA:DNA hybrids in the human genome have distinctive nucleotide characteristics, chromatin composition, and transcriptional relationships**  
776 J Nadel, R Athanasiadou, C Lemetre, NA Wijetunga, P Ó Broin, H Sato, Z Zhang, J Jeddelloh, C Montagna, A Golden, C Seoighe, JM Grealley (2015)  
777 *Epigenetics & Chromatin* **8**:46.  
778 doi:10.1186/s13072-015-0040-6
- 781 **How does RNase H recognize a DNA:RNA hybrid?**  
782 H Nakamura, Y Oda, S Iwai, H Inoue, E Ohtsuka, S Kanaya, S Kimura, C Katsuda, K Katayanagi, K Morikawa (1991)



- 784 *Proceedings of the National Academy of Sciences* **88**:11535-11539.
- 785 **Evaluation of fluorescent stains for visualizing extracellular DNA in biofilms**
- 786 M Okshevsky, RL Meyer (2014)
- 787 *Journal of Microbiological Methods* **105**:102-104.
- 788 doi:10.1016/j.mimet.2014.07.010
- 789 **The role of extracellular DNA in the establishment, maintenance and perpetuation of bacterial biofilms**
- 790 M Okshevsky, RL Meyer (2015)
- 791 *Critical Reviews in Microbiology* **41**:341-352.
- 792 doi:10.3109/1040841x.2013.841639
- 793 **Molecular mechanisms of biofilm infection: biofilm virulence factors**
- 794 PL Phillips, GS Schultz (2012)
- 795 *Advances in Wound Care* **1**:109-114.
- 796 doi:10.1089/wound.2011.0301
- 797 **Molecular simulations of RNA 2' -o-transesterification reaction models in solution**
- 798 BK Radak, ME Harris, DM York (2013)
- 799 *The Journal of Physical Chemistry B* **117**:94-103.
- 800 doi:10.1021/jp3084277
- 801 **Solid-state NMR for bacterial biofilms**
- 802 C Reichhardt, L Cegelski (2014)
- 803 *Molecular physics* **112**:887-894.
- 804 doi:10.1080/00268976.2013.837983
- 805 **The biofilm life cycle and virulence of *Pseudomonas aeruginosa* are dependent on a filamentous prophage**
- 806 SA Rice, CH Tan, PJ Mikkelsen, V Kung, J Woo, M Tay, A Hauser, D Mcdougald, JS Webb, S Kjelleberg (2009)
- 807 *The ISME journal* **3**:271-282.
- 808 doi:10.1038/ismej.2008.109
- 809 ***Mycobacterium avium* possesses extracellular DNA that contributes to biofilm formation, structural integrity, and tolerance to antibiotics**
- 810 SJ Rose, LM Babrak, LE Bermudez (2015)
- 811 *PLOS ONE* **10**:e0128772.
- 812 doi:10.1371/journal.pone.0128772
- 813 **Shear thickening in filled Boger fluids**
- 814 R Scirocco, J Vermant, J Mewis (2005)
- 815 *Journal of Rheology* **49**:551-567.
- 816 doi:10.1122/1.1849185
- 817 **Functional amyloids keep quorum-sensing molecules in check**
- 818 T Seviour, SH Hansen, L Yang, YH Yau, VB Wang, MR Stenvang, G Christiansen, E Marsili, M Givskov, Y Chen, DE Otzen, PH Nielsen, S Geifman-Shochat, S Kjelleberg, MS Dueholm (2015a)
- 819 *Journal of Biological Chemistry* **290**:6457-6469.
- 820 doi:10.1074/jbc.M114.613810
- 821 **Selectively inducing the synthesis of a key structural exopolysaccharide in aerobic granules by enriching for *Candidatus 'Competibacter phosphatis'***
- 822 T Seviour, LK Lambert, M Pijuan, Z Yuan (2011)
- 823 *Applied Microbiology and Biotechnology* **92**:1297-1305.
- 824 doi:10.1007/s00253-011-3385-1
- 825 **Molecular dynamics unlocks atomic level self-assembly of the exopolysaccharide matrix of water-treatment granular biofilms**
- 826 T Seviour, AK Malde, S Kjelleberg, Z Yuan, AE Mark (2012)
- 827 *Biomacromolecules* **13**:1965-1972.
- 828 doi:10.1021/bm3005808
- 829 **Gel-forming exopolysaccharides explain basic differences between structures of aerobic sludge granules and floccular sludges**
- 830 T Seviour, M Pijuan, T Nicholson, J Keller, Z Yuan (2009)
- 831 *Water Research* **43**:4469-4478.
- 832 doi:10.1016/j.watres.2009.07.018
- 833 **Solvent optimization for bacterial extracellular matrices: a solution for the insoluble**
- 834 T Seviour, P Weerachanchai, J Hinks, D Roizman, SA Rice, L Bai, J-M Lee, S Kjelleberg (2015b)

- 840 *RSC Advances* **5**:7469-7478.  
841 doi:10.1039/c4ra10930a
- 842 **Extensive genomic plasticity in *Pseudomonas aeruginosa* revealed by identification and distribution studies of**  
843 **novel genes among clinical isolates**  
844 K Shen, S Sayeed, P Antalis, J Gladitz, A Ahmed, B Dice, B Janto, R Dopico, R Keefe, J Hayes, S Johnson, S Yu,  
845 N Ehrlich, J Jocz, L Kropp, R Wong, RM Wadowsky, M Slifkin, RA Preston, G Erdos, JC Post, GD Ehrlich, FZ Hu  
846 (2006)  
847 *Infection and Immunity* **74**:5272-5283.  
848 doi:10.1128/IAI.00546-06
- 849 **Liquid phase condensation in cell physiology and disease**  
850 Y Shin, CP Brangwynne (2017)  
851 *Science* **357**:doi:10.1126/science.aaf4382
- 852 **Swirling flow of viscoelastic fluids. Part 2. Elastic effects**  
853 JR Stokes, LJW Graham, NJ Lawson, DV Boger (2001)  
854 *Journal of Fluid Mechanics* **429**:117-153.  
855 doi:10.1017/S0022112000002901
- 856 **Explosive cell lysis as a mechanism for the biogenesis of bacterial membrane vesicles and biofilms**  
857 L Turnbull, M Toyofuku, AL Hynen, M Kurosawa, G Pessi, NK Petty, SR Osvath, G Carcamo-Oyarce, ES Gloag, R  
858 Shimoni, U Omasits, S Ito, X Yap, LG Monahan, R Cavaliere, CH Ahrens, IG Charles, N Nomura, L Eberl, CB  
859 Whitchurch (2016)  
860 *Nature Communications* **7**:11220.  
861 doi:10.1038/ncomms11220
- 862 **Extended dissolution studies of cellulose in imidazolium based ionic liquids**  
863 J Vitz, T Erdmenger, C Haensch, US Schubert (2009)  
864 *Green Chemistry* **11**:417-424.  
865 doi:10.1039/b818061j
- 866 **NMR of proteins and nucleic acids**  
867 K Wüthrich (2008)  
868 2nd ed. New York: John Wiley and Sons.
- 869 **DNA stability in ionic liquids and deep eutectic solvents**  
870 H Zhao (2015)  
871 *Journal of Chemical Technology & Biotechnology* **90**:19-25.  
872 doi:doi:10.1002/jctb.4511  
873

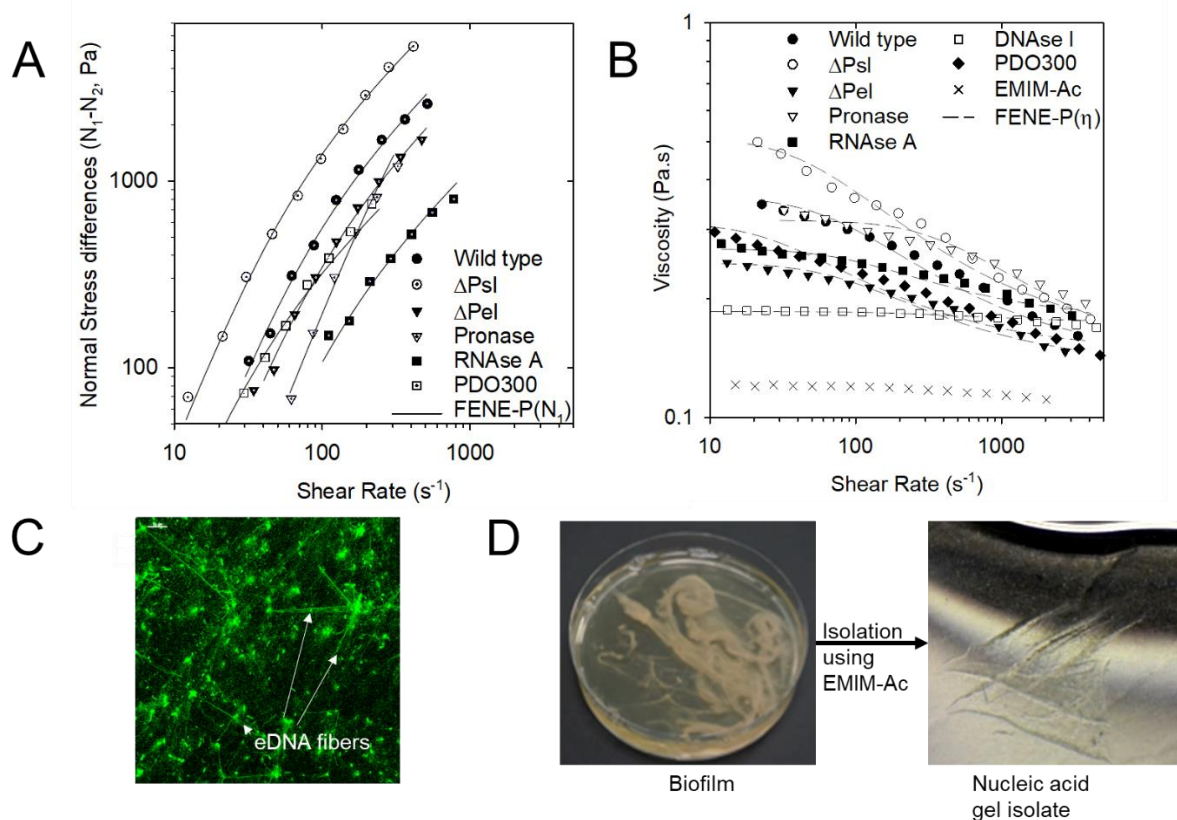

**Figure 1:** (A)  $N_1 - N_2$  and (B) viscosity against shear rate for *Pseudomonas aeruginosa* biofilm wild type, PDO300,  $\Delta Psl$ ,  $\Delta Pel$ , and pronase, RNase A and DNase I digested wild type biofilm immediately following dissolution in 1-ethyl-3-methylimidazolium acetate (40 mg/mL) at 25 °C, 100  $\mu$ m gap. This is measured as a function of shear stress from 10 to 1000 Pa. ( $N_1 - N_2$ ) is not described for DNase I digested biofilm in Figure 1A and Supplementary Figure 1B as their normal force ( $F_N$ ) is less than the resolution of the rheometer (i.e. 0.1 N) and set to zero for calculating ( $N_1 - N_2$ ). Both the  $N_1 - N_2$  and viscosity data are fitted with the FENE-P model, a rigid dumbbell model for polymer solutions. Fitting parameters are shown in Supplementary Table 2. (C) Micrograph of *P. aeruginosa* biofilm DNA stained green with TOTO-1 (scale bar 10  $\mu$ m). (D) Phase separation of extracellular nucleic acids extracted from *P. aeruginosa* biofilms into a gel occurs upon transfer from 1-ethyl-3-methylimidazolium acetate into water.

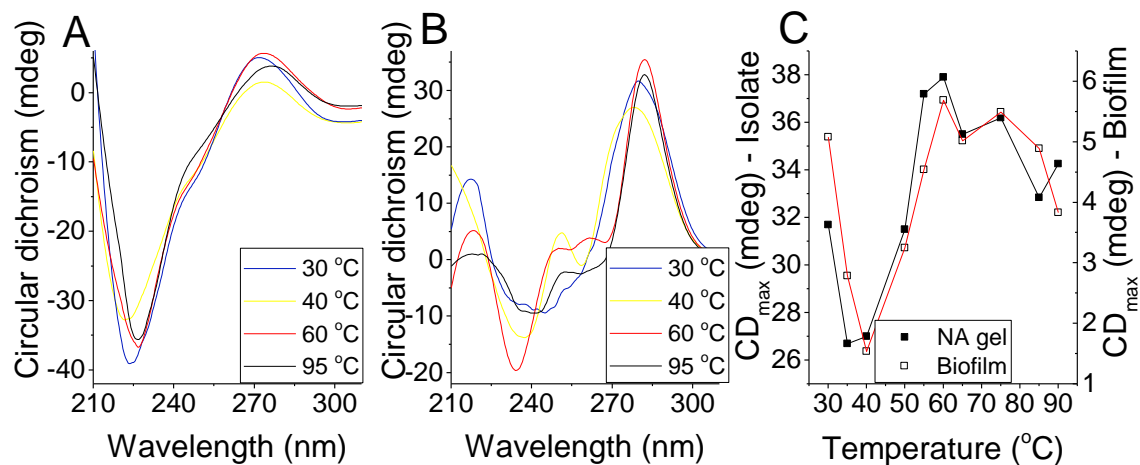

**Figure 2:** Circular dichroism (CD) spectra of (A) *Pseudomonas aeruginosa* biofilm and (B) extracellular nucleic acids (NA) gel isolate at temperatures between 30 and 95°C. (C) Amplitude of dominant NA peak,  $CD_{max}$  (260-285 nm), from CD spectra of *P. aeruginosa* biofilm (seen in (A)) and its extracted extracellular nucleic acid gel (seen in (B)) from T = 30°C to T = 95°C.

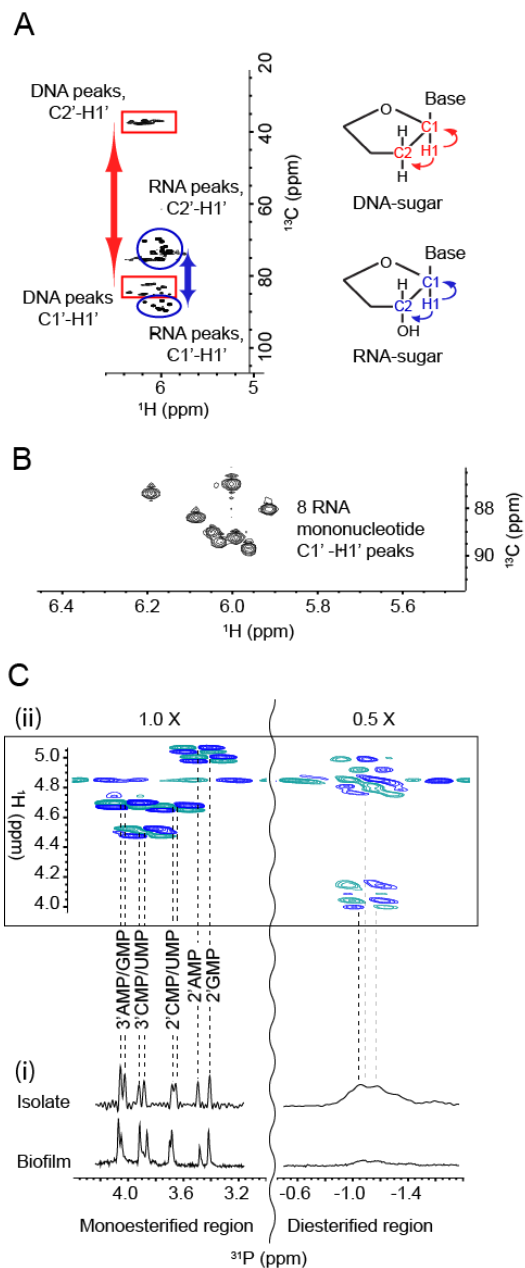

**Figure 3:** (A) Nuclear magnetic resonance (NMR)  $^1\text{H}$ - $^{13}\text{C}$  heteronuclear single quantum coherence (HSQC)-total correlation spectroscopy (TOCSY) spectrum at 25°C of extracellular nucleic acids (NA) gel isolate after alkalization showing the C1'-H1' cross peaks of RNA (blue ovals) and DNA (red rectangles) and their correlations to the neighboring carbon C2'-H1'. Schematics (right) illustrate these correlations. (B)  $^1\text{H}$ - $^{13}\text{C}$  HSQC spectrum of extracellular NA gel isolate at 25°C after alkalization identifying eight monoribonucleic acid ribose spin systems. (C) 1-D  $^{31}\text{P}$  NMR of NA isolate gel and *Pseudomonas aeruginosa* biofilm with proton decoupling showing the presence of monoesterified (i.e. monoribonucleotides) and diesterified (i.e. DNA) phosphate peaks (i), and 2-D  $^1\text{H}$ - $^{31}\text{P}$  heteronuclear correlation (HETCOR) spectrum of extracellular NA showing the  $^{31}\text{P}$ - $^1\text{H}$  cross-peaks of monoribonucleotides and DNA (ii). Couplings of monoesterified phosphates to H2' or H3' of eight monoesterified monoribonucleotides (from left to right: 3' AMP/3' GMP, 3' CMP/3' UMP, 2' CMP/2' UMP, 2' AMP, 2' GMP); and diesterified phosphate to DNA H3' and H5'/H5'' protons, are denoted by the dashed lines. There is a discontinuity (wavy line) in the  $^{31}\text{P}$  axis due to the different thresholds required to illustrate the  $^{31}\text{P}$ - $^1\text{H}$  correlations in the mono-esterified and di-esterified regions. All

samples were prepared in 0.1 M NaOD (10 mg/mL) and preheated to 55°C for 2 h.

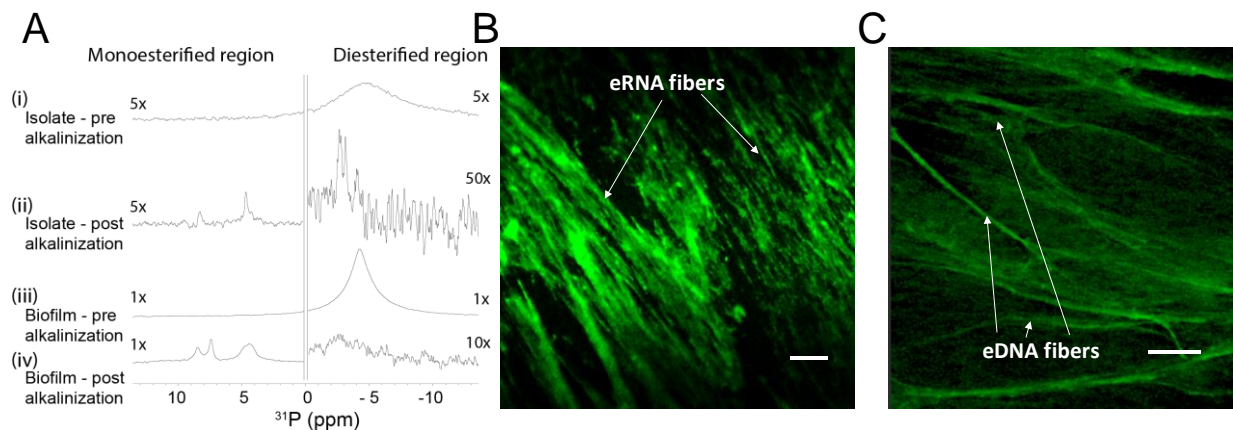

**Figure 4:** (A) Solid-state  $^{31}\text{P}$  NMR spectra at  $T = 25^\circ\text{C}$  of extracellular NA gel isolate (i), alkalinized and lyophilized NA gel isolate (ii), *Pseudomonas aeruginosa* biofilm (iii) and alkalinized and lyophilized *P. aeruginosa* biofilm (iv) showing the presence of diesterified phosphate peaks and the absence of monoesterified phosphate peaks for both NA gel isolate and biofilm in double distilled water, and the coexistence of diesterified and monoesterified phosphate peaks for both samples after alkalization. This indicates that alkalization of the matrix results in RNA transesterification. Micrographs of *P. aeruginosa* NA gel isolate stained green with (B) SYTO RNASelect showing RNA fibers and (C) TOTO-1 showing DNA fibers (scale bar 10  $\mu\text{m}$ ).

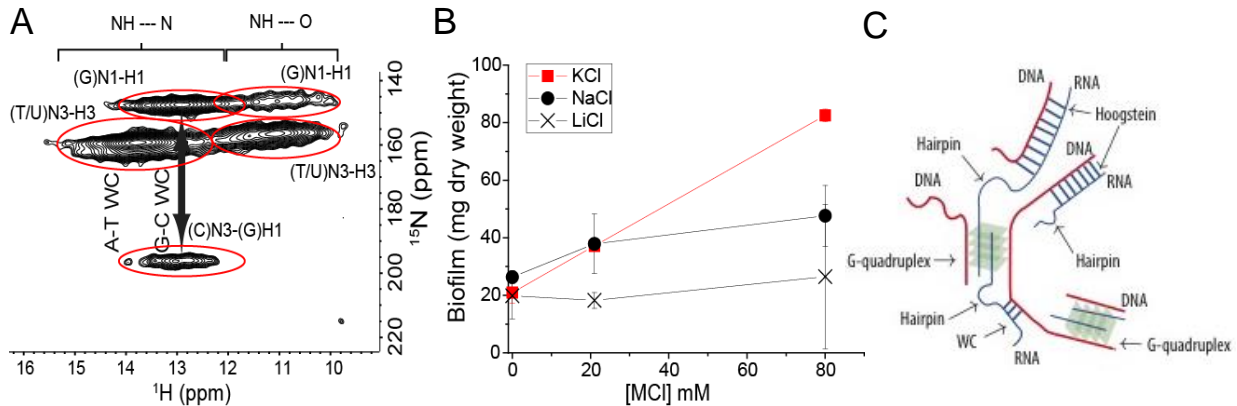

**Figure 5:** (A) Solid-state 2D  $^1\text{H}$ - $^{15}\text{N}$  through-space heteronuclear correlation (HETCOR) spectrum of extracellular nucleic acid (NA) gel isolate in double distilled water (2 mg),  $T = 25^\circ\text{C}$  showing direct N-H couplings for G imino N (N3) and T/U imino N (N3) bonded to nucleobase nitrogen ( $\text{NH}\cdots\text{N}$ ). This indicates Watson-Crick (WC) G-C and U/T-A base pairings respectively; and for G imino N (N1) and T/U imino N (N3) bonded to nucleobase carbonyl oxygen (i.e.  $\text{NH}\cdots\text{O}$ ) indicating non-canonical G-G, G-T/U and U/T-U/T base pairings or tetrads. The spectrum also displayed indirect N-H correlations for the WC base pairs (i.e. C(N3) to G(H1) and A(N1) to U/T(H1)) and no indirect correlations for the non-canonical bonded nucleobases. The threshold for the A(N1)-T/U(H3) correlation was increased due to lower signal intensity for that particular coupling. (B) *Pseudomonas aeruginosa* biofilm growth yield at  $37^\circ\text{C}$  (5 d) as a function of  $[\text{K}^+]$ ,  $[\text{Na}^+]$  or  $[\text{Li}^+]$  showing the growth dependence on monovalent cation concentration ( $\text{K}^+ > \text{Na}^+ > \text{Li}^+$ ). Error bars indicate standard deviation. (C) Illustration of how structural variability of RNA may allow for the formation of extracellular RNA and DNA networks through hairpins and a mixture of canonical and non-canonical base pairs or tetrads (i.e. Hoogsteen and G-quadruplexes).

## Supplementary Information for

### **The biofilm matrix scaffold of *Pseudomonas* species consists of non-canonically base paired extracellular DNA and RNA**

Thomas Seviour<sup>1,\*</sup>, Fernaldo Richtia Winnerdy<sup>2</sup>, Wong Lan Li<sup>1</sup>, Xiangyan Shi<sup>2</sup>, Sudarsan Mugunthan<sup>1</sup>, Gurjeet Singh Kohli<sup>1</sup>, Heather M Shewan<sup>3</sup>, Jason R Stokes<sup>3</sup>, Scott A Rice<sup>1,4</sup>, Anh Tuân Phan<sup>2</sup>, Staffan Kjelleberg<sup>1,5,6</sup>

<sup>1</sup>Singapore Centre for Environmental Life Sciences Engineering, Nanyang Technological University, 637551, Singapore. <sup>2</sup>School of Physical and Mathematical Sciences, Nanyang Technological University, 637371, Singapore. <sup>3</sup>School of Chemical Engineering, The University of Queensland, 4072, Brisbane, Australia. <sup>4</sup>The iThree Institute, The University of Technology Sydney, Sydney, 2007, Australia. <sup>5</sup>School of Biological Sciences, Nanyang Technological University, 637551, Singapore. <sup>6</sup>Centre for Marine Bio-Innovation, School of Biological, Earth and Environmental Sciences, University of New South Wales, Sydney, 2052, Australia.

Correspondence to: [twseviour@ntu.edu.sg](mailto:twseviour@ntu.edu.sg)

#### **This PDF file includes:**

Supplementary Figs. 1 to 19  
Supplementary Tables 1-2



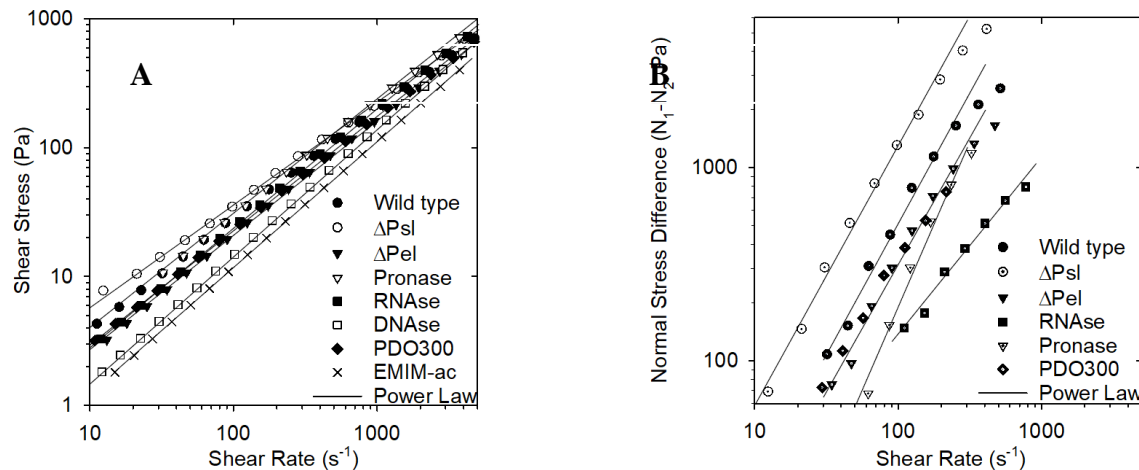

**Supplementary Fig. 1:** (A) Shear stress and (B) normal stress differences ( $N_1 - N_2$ ) as a function of shear rate for *P. aeruginosa* biofilm: wild type; PDO300;  $\Delta Psl$ ,  $\Delta Pel$ ; pronase digested; RNase A digested; and DNase I digested wild type biofilm, dissolved in 1-ethyl-3-methylimidazolium acetate (40 mg/mL) at 25 °C, 100  $\mu m$  rheometer measurement gap, shear stress sweep from 10 to 1000 Pa. ( $N_1 - N_2$ ) is not described for DNase I digested biofilm as its normal force ( $F_N$ ) is less than the resolution of the rheometer (i.e. 0.1 N) and is set to zero for calculating ( $N_1 - N_2$ ). Lines indicate power-law fits to the data. The power law dependences of shear stress on shear rate ( $m$ ) (see Table S1) indicate Newtonian-like rheological properties.

5

10

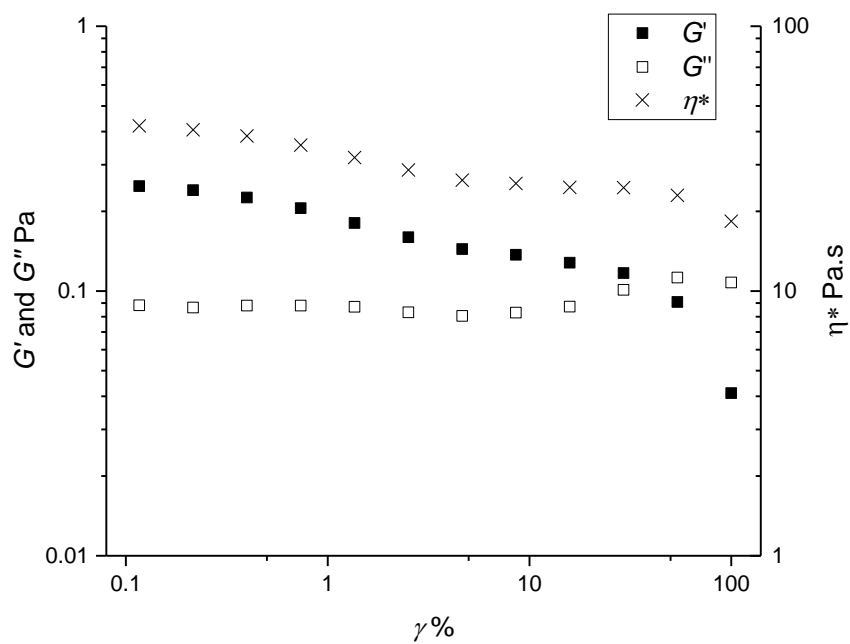

**Supplementary Fig. 2:** Storage modulus ( $G'$ ), loss modulus ( $G''$ ) and complex viscosity ( $\eta^*$ ) of *P. aeruginosa* wild type biofilm in amplitude sweep at 25°C, 50  $\mu\text{m}$  gap, 0.1  $\text{s}^{-1}$  frequency, showing that the biofilm behaves like a gel at low amplitude (i.e.  $G' > G''$ ). Note,  $G'$  is not measurable in the DNase I treated biofilm.

5

10

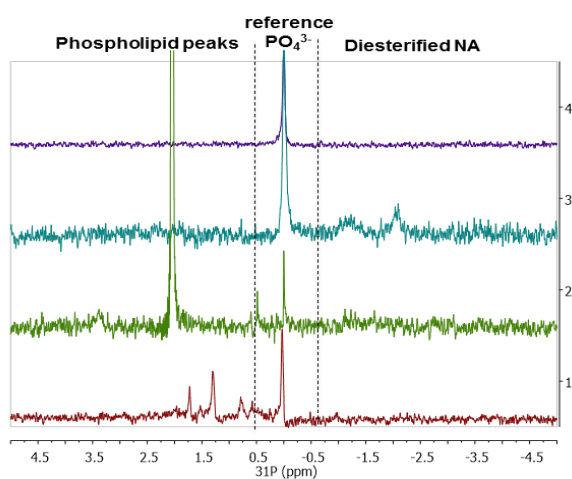

5

**Supplementary Fig. 3:** <sup>31</sup>P NMR spectrum of H<sub>3</sub>PO<sub>4</sub> solution in EMIM-Ac (— upper), lyophilized *P. aeruginosa* wild type biofilm in EMIM-Ac (10 mg.mL<sup>-1</sup>) (— second upper), asolectin standard in EMIM-Ac (— second lower) and SDS and lysozyme-treated *P. aeruginosa* wild type planktonic cells (— lower) at 25°C, showing phospholipid peaks for asolectin in EMIM-Ac, for lysed *P. aeruginosa* cells (SDS, lysozyme) in water, and the absence of phospholipid peaks in the spectrum of *P. aeruginosa* treated with EMIM-Ac.

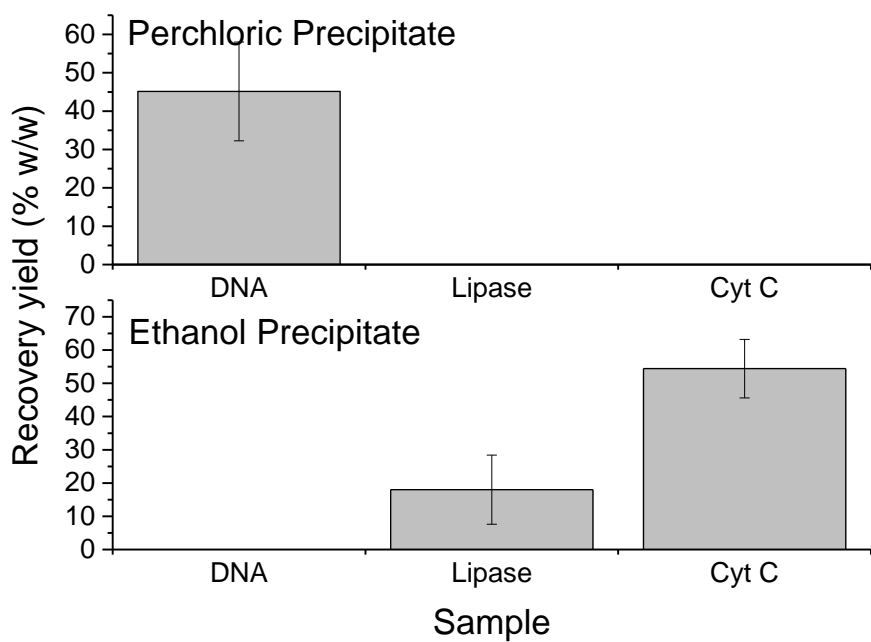

**Supplementary Fig. 4:** Recovery yield of calf thymus DNA, lipase and cytochrome c standards following EMIM-Ac solubilization and recovery with perchloric acid (upper) followed by ethanol (lower). Error bars indicate standard deviation.

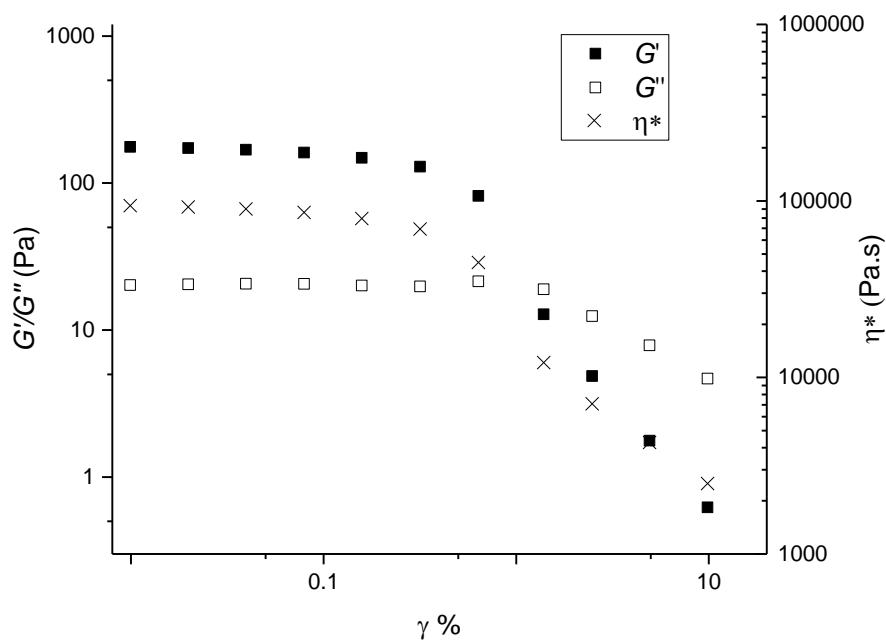

**Supplementary Fig. 5:** Storage modulus ( $G'$ ), loss modulus ( $G''$ ) and complex viscosity ( $\eta^*$ ) of *P. aeruginosa* wild type biofilm extracellular nucleic acid gel isolate in amplitude sweep at 25°C, 50  $\mu\text{m}$  gap, 0.1  $\text{s}^{-1}$  frequency, showing that the biofilm behaves like a gel at low amplitude (i.e.  $G' > G''$ ).

5

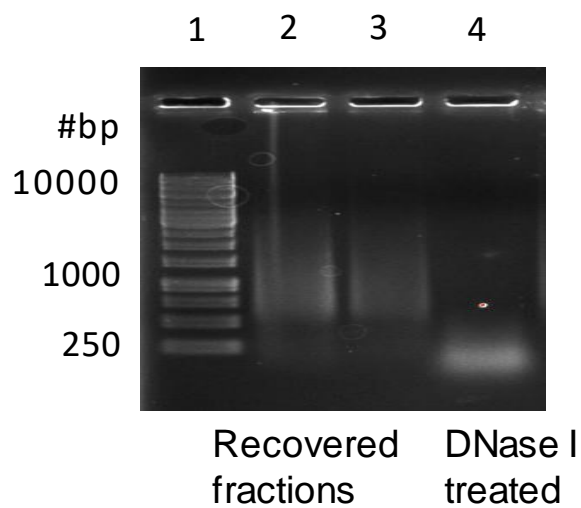

**Supplementary Fig. 6:** Agarose electrophoretic gel showing *P. aeruginosa* eDNA (Lanes 2 and 3) and digested with DNase (Lane 4). Lane 1 is the GeneRuler 1 kbp ladder.

5

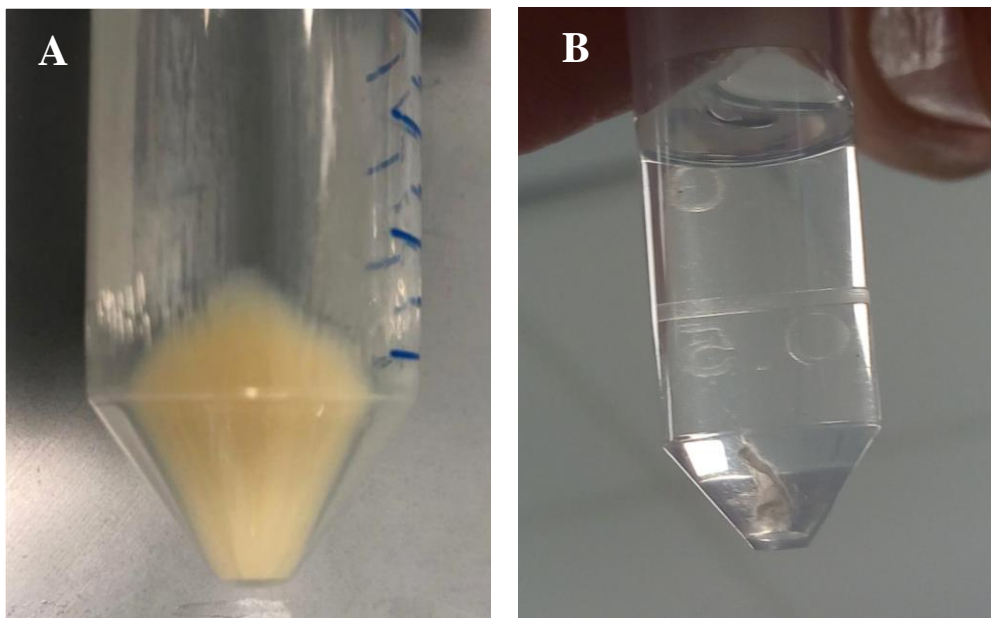

25 **Supplementary Fig. 7:** (A) Photograph of *P. aeruginosa* biofilm extracellular polymeric substances recovered by ethanol precipitation (70 % v/v) from 1-ethyl-3-methylimidazolium, dialyzed against double distilled water and then pelleted by centrifugation (10,000 g, 4°C) after it was dissolved (20 mg.mL<sup>-1</sup>) and eDNA first removed by perchloric acid precipitation (5 % v/v), showing that gelation was not observed once the nucleic acids were removed. (B) Photograph of calf thymus DNA recovered from 1-ethyl-3-methylimidazolium after dissolution (6 mg.mL<sup>-1</sup>), perchloric acid precipitation and dialysis against double distilled water showing that gelation is not a  
30 universal feature of all DNA following dissolution in 1-ethyl-3-methylimidazolium acetate and perchloric acid precipitation.

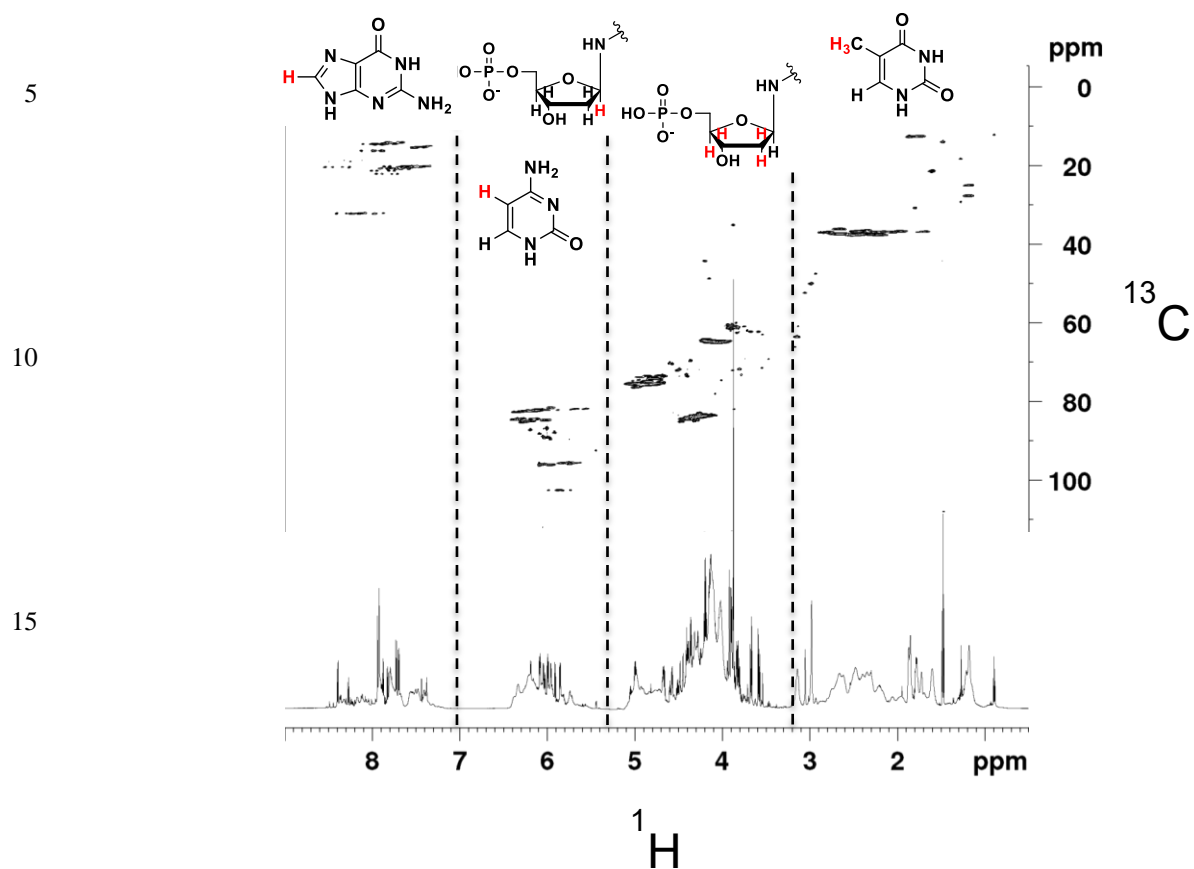

**Supplementary Fig. 8**  $^1\text{H}$ - $^{13}\text{C}$  HSQC-TOCSY and 1-D  $^1\text{H}$  NMR spectra of *P. aeruginosa* biofilm extracellular NA gel isolate following alkalization (0.1 M NaOD, 10 mg.mL<sup>-1</sup>, 55°C, 2 h) at 25°C showing a distribution of  $^1\text{H}$ - $^{13}\text{C}$  HSQC-TOCSY cross peaks that is consistent with the presence of nucleic acids and the absence of proteins and hexose-based sugars.



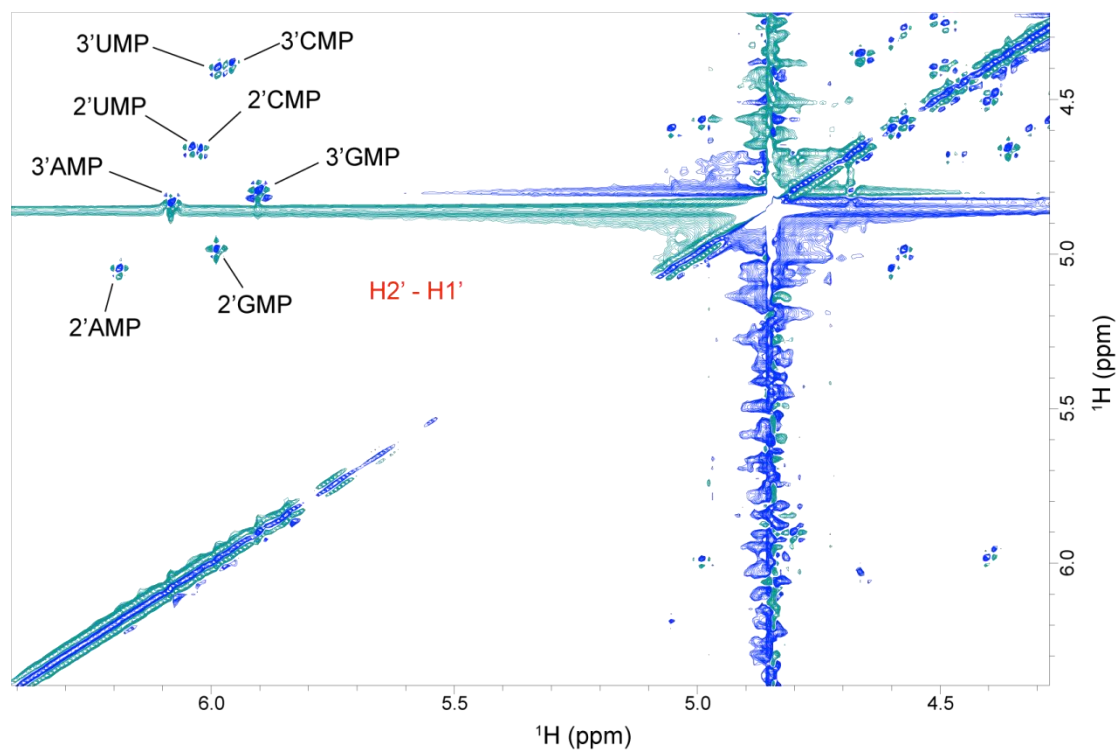

**Supplementary Fig. 9:**  $^1\text{H}$ - $^1\text{H}$  COSY NMR spectrum of *P. aeruginosa* biofilm extracellular NA gel isolate following alkalization (0.1 M NaOD, 10 mg.mL<sup>-1</sup>, 55°C, 2 h).

5

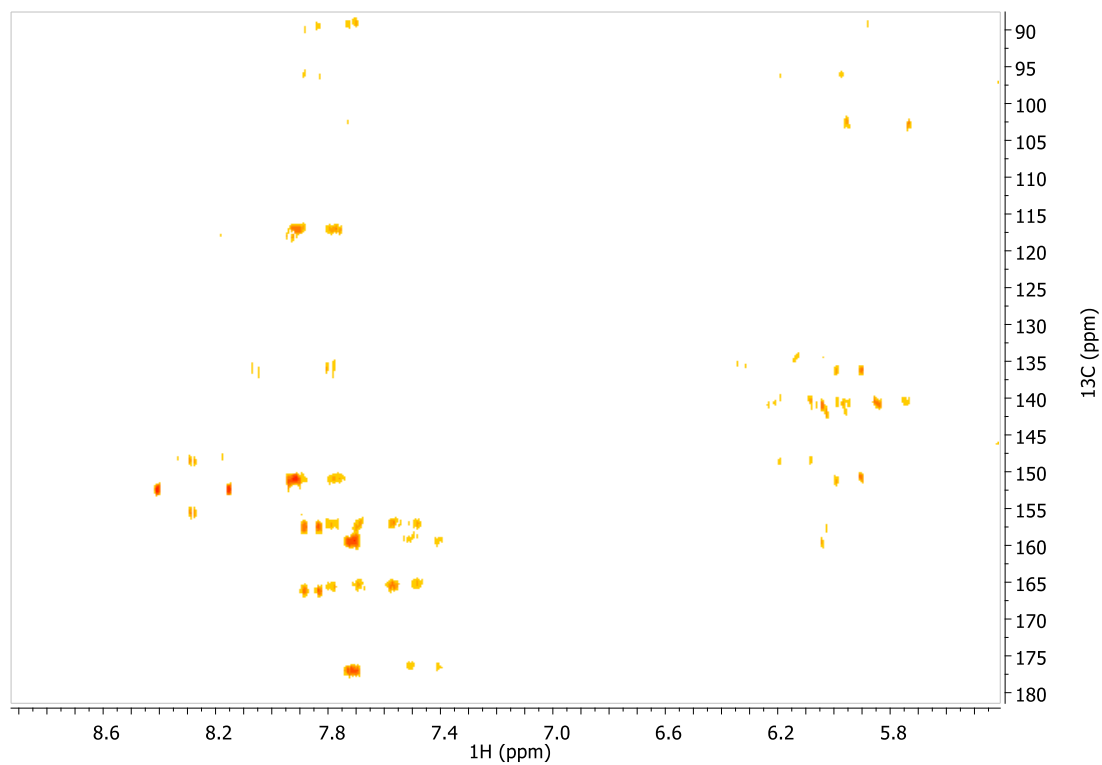

**Supplementary Fig. 10:**  $^1\text{H}$ - $^{13}\text{C}$  HMBC NMR spectrum of *P. aeruginosa* biofilm extracellular NA gel isolate at 25°C following alkalization (0.1 M NaOD, 10 mg.mL<sup>-1</sup>, 55°C, 2 h).

5

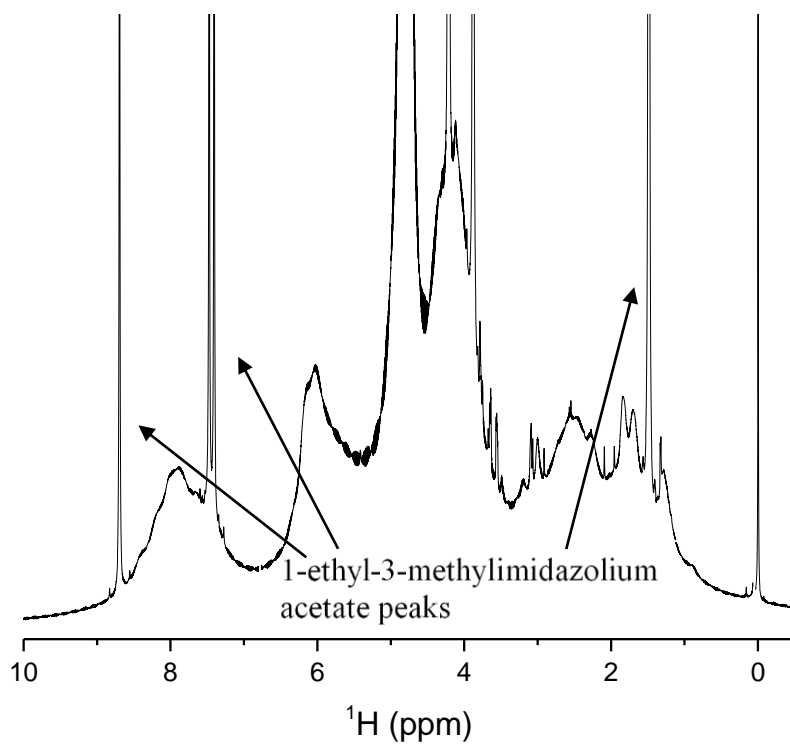

**Supplementary Fig. 11:**  $^1\text{H}$  NMR spectra of *P. aeruginosa* biofilm NA gel isolate in  $\text{D}_2\text{O}$  at  $25^\circ\text{C}$ .

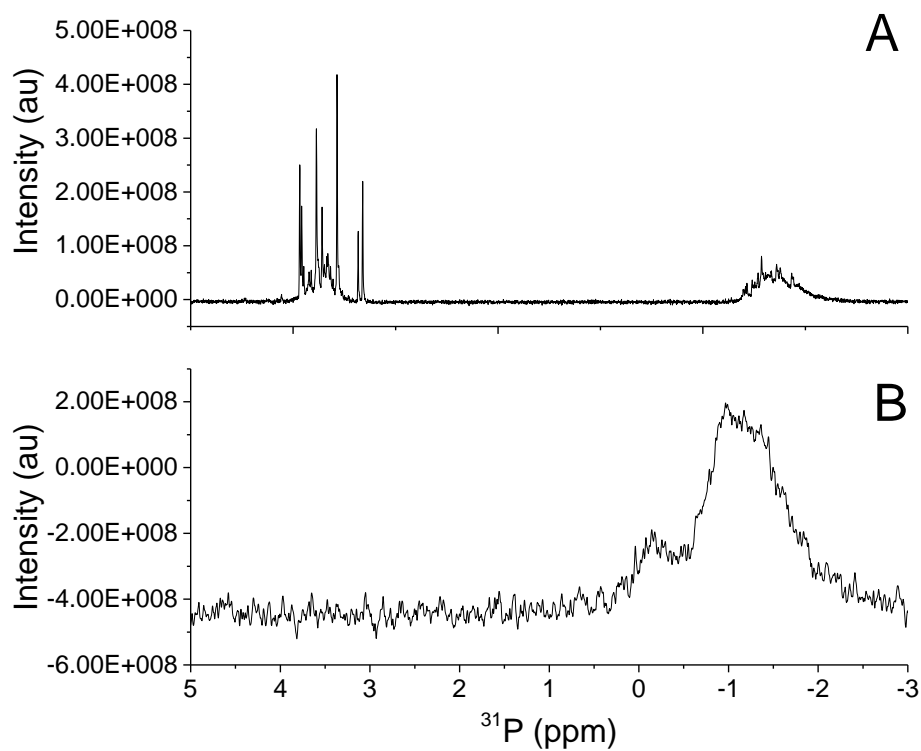

5

**Supplementary Fig. 12:**  $^{31}\text{P}$  NMR spectrum of RNA standard (torula yeast) at 25°C following alkalization (0.1 M NaOD, 10 mg.mL $^{-1}$ , 55°C, 2 h) (A) and in D $_2$ O following EMIM-Ac solubilisation and perchloric acid recovery (10 mg.mL $^{-1}$ ) (B) demonstrating that alkalization only leads to RNA transesterification.

5  
10  
15  
20  
25

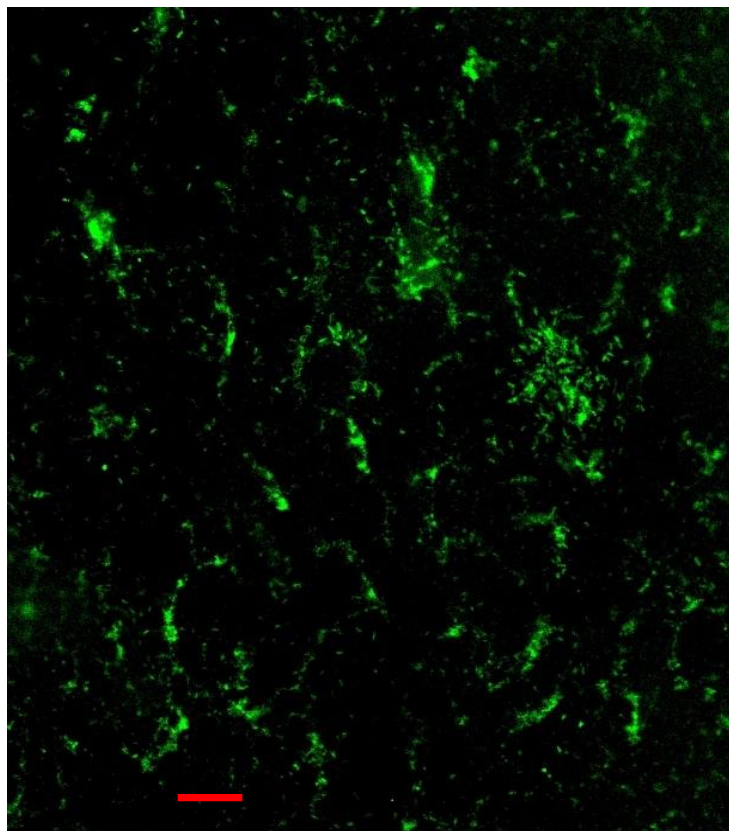

30 **Supplementary Fig. 13:** Micrograph of *P. aeruginosa* NA gel isolate, digested with DNase I and stained green with SYTO RNASelect, showing that SYTO RNASelect is binding to extracellular RNA (scale bar 10  $\mu$ m).

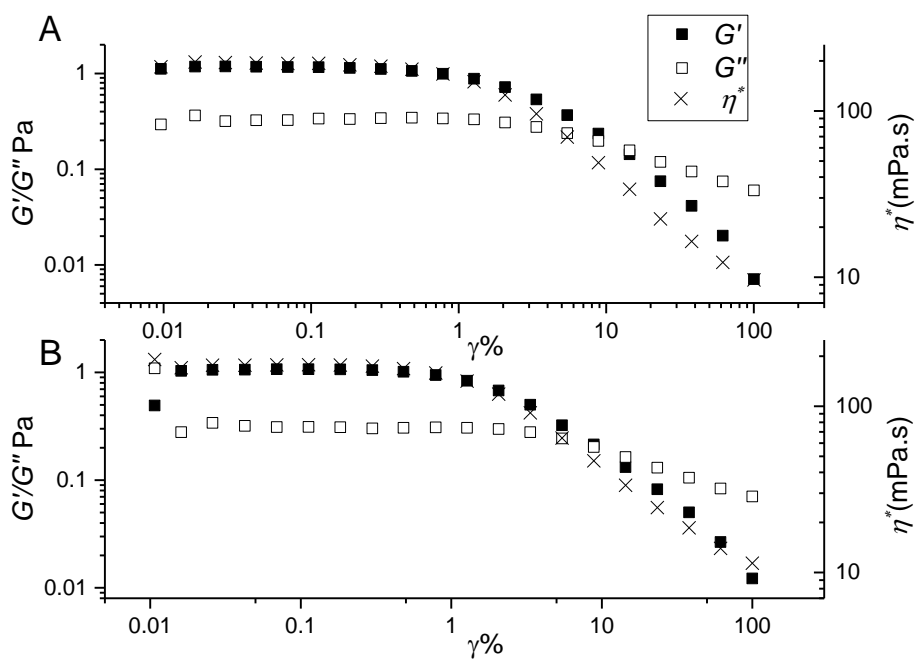

**Supplementary Fig. 14:** Storage modulus ( $G'$ ), loss modulus ( $G''$ ) and complex viscosity ( $\eta^*$ ) of *P. aeruginosa* wild type biofilm extracellular nucleic acid gel isolate in amplitude sweep at 25°C, 50  $\mu\text{m}$  gap, 0.1  $\text{s}^{-1}$  frequency, showing that the biofilm behaves like a gel at low amplitude (i.e.  $G' > G''$ ) even after digestion with RNase III (A) and RNase H (B).

5

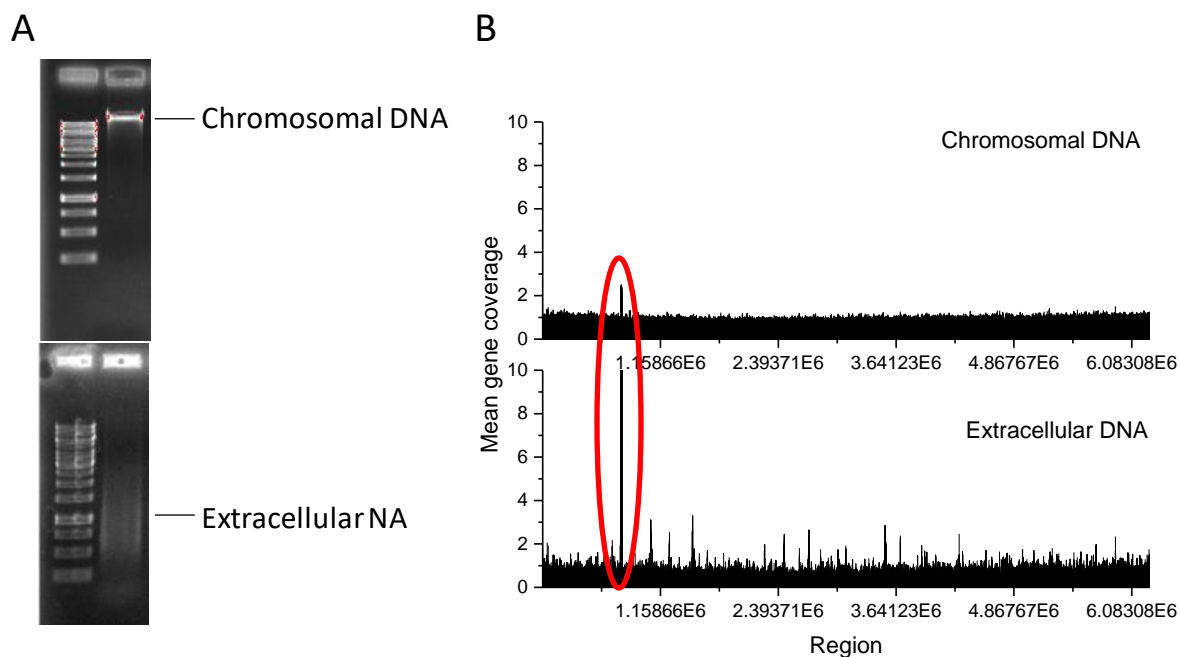

**Supplementary Fig. 15:** Agarose gel loaded with chromosomal DNA extracted from *P. aeruginosa* pre-culture planktonic cells (upper) and extracellular NA gel isolate (lower) (A). Gene coverage of *P. aeruginosa* biofilm chromosomal (upper) and extracellular (lower) DNA normalized against *rpoB* numbers. The red oval denotes the peak resulting from bacteriophage Pf1 genes (B).

5

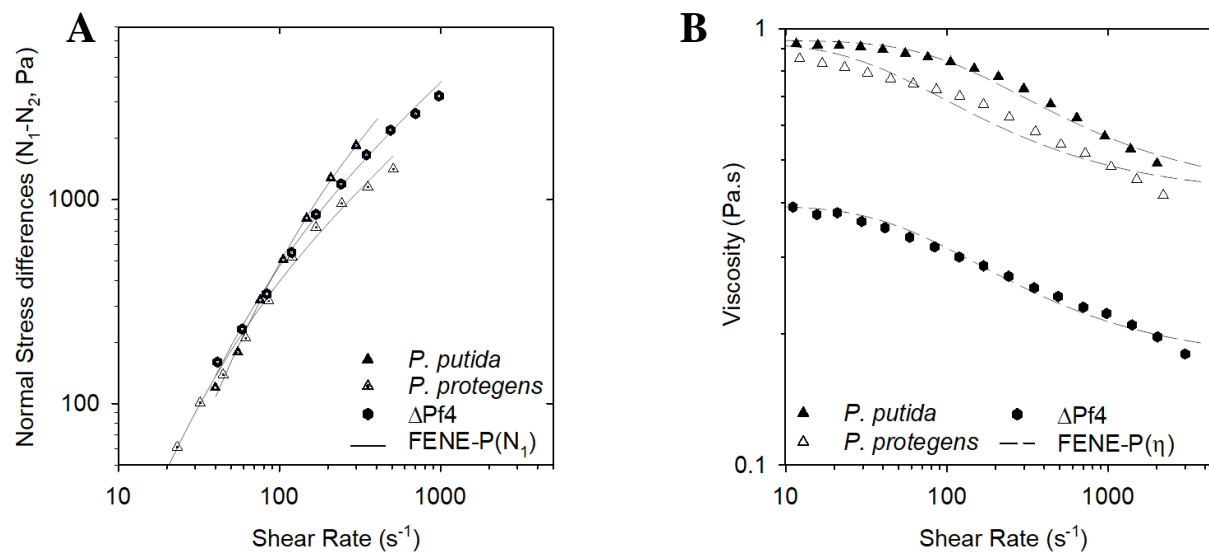

**Supplementary Fig. 16:** (A) Normal stress differences ( $N_1 - N_2$ ) and (B) shear stress as a function of shear rate for *Pseudomonas* biofilms: *P. putida*, *P. protegens* and *P. aeruginosa*  $\Delta Pf4$ , dissolved in 1-ethyl-3-methylimidazolium acetate ( $40 \text{ mg.mL}^{-1}$ ) at  $25^\circ\text{C}$ . Lines indicate FENE-P fits to the data.

5



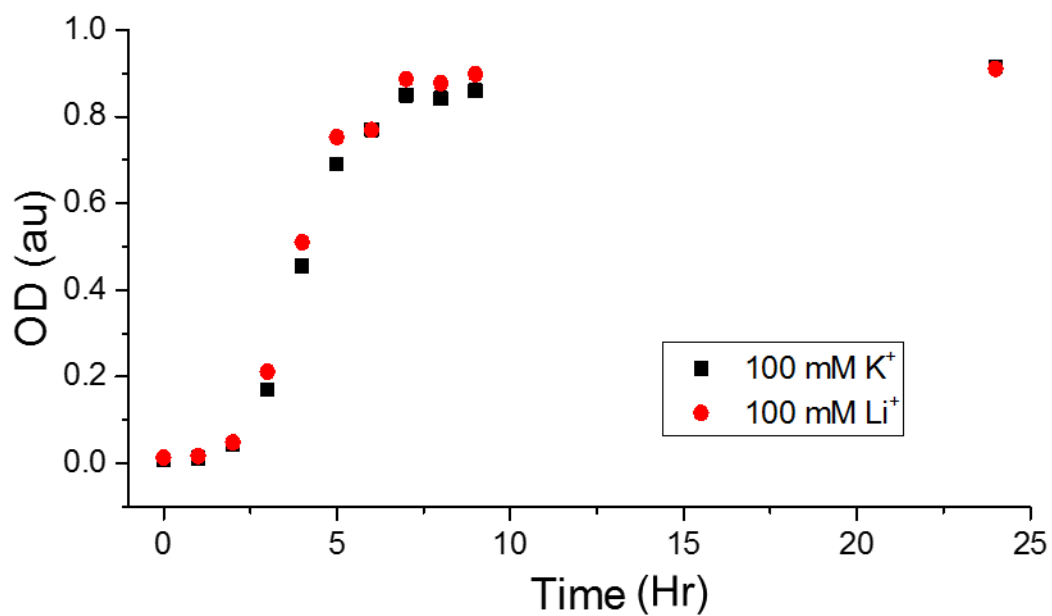

**Supplementary Fig. 17:** Overnight growth curve for *P. aeruginosa* cells grown in lithium and potassium enhanced modified M9 media, showing that potassium does not enhance planktonic growth over lithium.

5

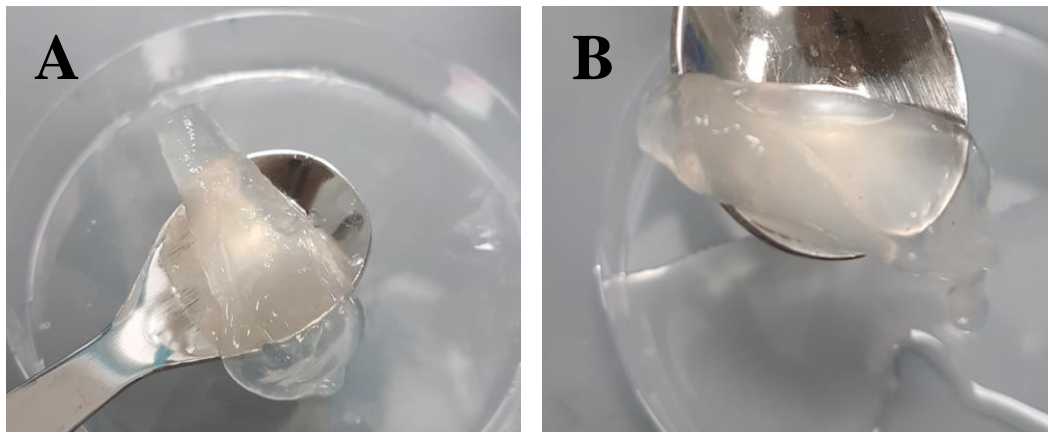

**Supplementary Fig. 18:** Photograph of nucleic acid gel extracted from (A) *P. protegens* and (B) *P. putida*.

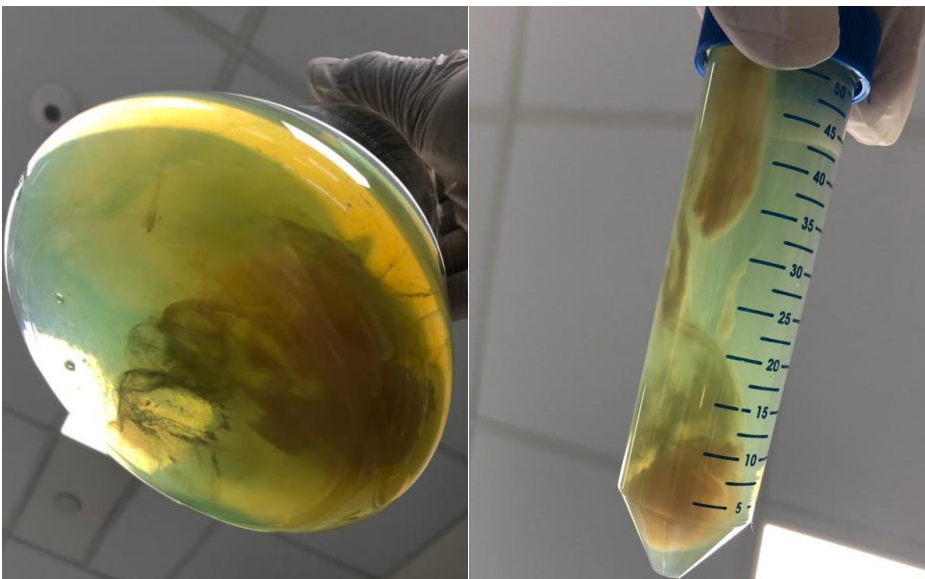

20

**Supplementary Fig. 19:** Photographs of *P. aeruginosa* biofilm after 5-d static growth in lysogeny broth medium at 37°C in 2 L Erlenmeyer flask (A) before centrifugation and (B) in 50 mL centrifuge tube after centrifugation showing the separation of biofilm from supernatant.

25

5 **Supplementary Table 1:** Power law exponent (i.e.  $n$  in  $N_1 = K\dot{\gamma}^n$  and  $m$  in  $\sigma = K_\sigma\dot{\gamma}^m$ ) of *P. aeruginosa* biofilms following dissolution in EMIM-Ac.  $m$  values approaching unity indicate a Newtonian-like fluid property. Viscosity is slightly shear thinning ( $m = 0.8$  to  $0.9$ ) for all samples except RNase, DNase and EMIM-Ac which are Newtonian like ( $m \geq 0.93$ ), which would be expected from dilute polymer solutions in viscous fluids (i.e. Boger fluids).

| Sample                         | $\sigma = K_\sigma\dot{\gamma}^m$ |         |      |         | $N_1 = K_{N1}\dot{\gamma}^n$ |         |      |         |
|--------------------------------|-----------------------------------|---------|------|---------|------------------------------|---------|------|---------|
|                                | $K_\sigma$                        |         | $m$  |         | $K_{N1}$                     |         | $n$  |         |
|                                | Ave.                              | Std Dev | Ave. | Std Dev | Ave.                         | Std Dev | Ave. | Std Dev |
| <i>P. aeruginosa</i> wild type | 0.63                              | 0.08    | 0.84 | 0.01    | 1.44                         | 0.45    | 1.36 | 0       |
| $\Delta$ Psl                   | 1.26                              | 0.35    | 0.76 | 0.04    | 7.81                         | 5.18    | 1.21 | 0.15    |
| $\Delta$ Pel                   | 0.35                              | 0       | 0.89 | 0       | 0.58                         | 0.15    | 1.34 | 0.02    |
| Pronase                        | 0.55                              | 0.03    | 0.89 | 0       | 0.18                         | 0.11    | 1.64 | 0.08    |
| RNase                          | 0.34                              | 0.01    | 0.93 | 0       | 2.11                         | 0.09    | 0.91 | 0.01    |
| <i>P. putida</i>               | 1.32                              | 0.01    | 0.91 | 0.01    | 0.56                         | 0.16    | 1.48 | 0.08    |
| PDO300                         | 0.73                              | 0.35    | 0.89 | 0.01    | 2.33                         | 0.59    | 1.10 | 0.03    |
| <i>P. protegens</i>            | 1.14                              | 0.01    | 0.90 | 0.01    | 2.75                         | 1.30    | 1.10 | 0.11    |
| $\Delta$ Pf4                   | 0.57                              | 0.02    | 0.87 | 0.01    | 1.59                         | 1.25    | 1.33 | 0.24    |
| DNase                          | 0.20                              | 0.01    | 0.99 | 0.01    | -                            | -       | -    | -       |
| EMIM-Ac                        | 0.13                              | 0       | 0.98 | 0       | -                            | -       | -    | -       |

10

**Supplementary Table 2:** Fitting parameters for the FENE-P model including  $\lambda_1$  = relaxation time,  $b$  = a measure of the relative extensibility of the model spring,  $\eta_s$  = solvent viscosity,  $\eta_p$  = polymer contribution to the viscosity. Molecular extensibility and relaxation times, as predicted by FENE-P, decrease in accordance with elasticity.

| Sample                         | Average |             |          |          | Std. Deviation |             |          |          |
|--------------------------------|---------|-------------|----------|----------|----------------|-------------|----------|----------|
|                                | $b$     | $\lambda_1$ | $\eta_p$ | $\eta_s$ | $b$            | $\lambda_1$ | $\eta_p$ | $\eta_s$ |
| <i>P. aeruginosa</i> wild type | 2248.5  | 0.322       | 0.260    | 0.145    | 643.1          | 0.066       | 0.040    | 0.0026   |
| $\Delta$ Psl                   | 3511.5  | 0.676       | 0.381    | 0.161    | 1000.9         | 0.219       | 0.113    | 0.0114   |
| $\Delta$ Pel                   | 2000.8  | 0.227       | 0.110    | 0.133    | 637.8          | 0.056       | 0.000    | 0.0025   |
| Pronase                        | 1871.8  | 0.103       | 0.197    | 0.167    | 693.1          | 0.047       | 0.015    | 0.0339   |
| RNase                          | 399.2   | 0.102       | 0.095    | 0.183    | 17.6           | 0.008       | 0.003    | 0.0077   |
| PDO300                         | 909.4   | 0.453       | 0.138    | 0.147    | 134.2          | 0.023       | 0.026    | 0.0007   |
| DNase                          | 135.7   | 0.005       | 0.020    | 0.129    | 106.8          | 0.001       | 0.011    | 0.0112   |
| $\Delta$ Pf4                   | 865.4   | 0.230       | 0.243    | 0.166    | 129.9          | 0.034       | 0.022    | 0.0072   |
| <i>P. protegens</i>            | 137.2   | 0.175       | 0.501    | 0.414    | 19.2           | 0.028       | 0.025    | 0.0013   |
| <i>P. putida</i>               | 336.9   | 0.071       | 0.544    | 0.440    | 53.5           | 0.002       | 0.018    | 0.0199   |

15
